# Supplementary material for: A Genome-Wide Transcriptional Analysis of Yeast-Hyphal Transition in Candida tropicalis by RNA-Seq
Source: PLoS One. 2016 Nov 16;11(11):e0166645. doi: 10.1371/journal.pone.0166645 (PMC5112795; doi:10.1371/journal.pone.0166645)
Supplement: S3 File — (XLSX) [file pone.0166645.s003.xlsx]

## Sheet: Sheet1
Gene_ID	Gene_Length	ZRCT4_FPKM	ZRCT4_F_FPKM	ZRCT45_F_FPKM	ZRCT45_FPKM	ZRCT52_FPKM	ZRCT52_F_FPKM
CTRG_00001	2340	35.5	37.68	69.09	35.94	49.27	75.63
CTRG_00002	552	266.87	270.2	269.69	292.6	507	537.69
CTRG_00003	2307	51.73	49.14	98.98	80.09	90.11	97.19
CTRG_00004	1455	0	0	0.82	0.44	0.86	1.56
CTRG_00005	4014	13.3	20.86	36.66	24.76	30.06	47.14
CTRG_00006	1107	64.18	76.76	78.85	102.38	86.76	70.34
CTRG_00007	279	1307.39	1552.11	1330.07	1866.7	1547.45	1446.92
CTRG_00008	966	27.32	36.41	16.53	24.63	45.1	59.42
CTRG_00009	1008	113.66	115.46	122.63	113.38	128.07	88.5
CTRG_00010	3021	13.23	16.91	34.44	21.66	31.01	39.48
CTRG_00011	1290	4.72	5.44	9.69	6.66	17.45	17.32
CTRG_00012	1338	163.07	142.04	119.02	141.79	168.12	162.36
CTRG_00013	1311	731.67	459.98	417.69	755.55	742.3	885.07
CTRG_00014	393	380.37	365.7	287.34	421.19	232.47	253.71
CTRG_00015	1563	41.44	40.39	47.32	44.27	45.05	68.27
CTRG_00016	1320	256.54	345.17	382.59	177.35	179.8	253.71
CTRG_00017	576	311.64	264.93	125.76	155.31	147.84	151.91
CTRG_00018	933	274.24	212.65	180.49	161.81	152.66	195.92
CTRG_00019	777	33.33	58.57	61.99	53.74	77.11	86.45
CTRG_00020	276	827.05	948.84	817.34	1103.1	1281.4	777.97
CTRG_00021	3402	3.23	4.25	8.52	4.78	9.46	14.93
CTRG_00022	2004	8.22	13.46	21.71	12.97	18.21	40.98
CTRG_00023	1572	5.8	8.48	9.48	9.85	15.32	20.22
CTRG_00024	2577	10.87	5.39	14.66	11.91	16.85	22.54
CTRG_00025	1188	15.1	15.8	20.68	22.39	26.38	22.02
CTRG_00026	711	14309.3	11822.7	9773.76	12857.8	11698.9	7871.31
CTRG_00027	1719	17.12	25.75	51.97	43.85	46.15	66.36
CTRG_00028	669	99.48	109.62	55.76	53.37	125.86	80.26
CTRG_00029	681	4.62	1.93	8.94	2.7	7.93	8.5
CTRG_00030	363	36.28	43.02	32.85	27.53	59.08	50.85
CTRG_00031	2055	2.13	5.93	7.33	5.4	9.67	14.77
CTRG_00032	1461	16.37	19.5	22.42	23.49	23.42	36.89
CTRG_00033	999	8.78	12.68	14.47	7.25	14.63	17.45
CTRG_00034	681	1.78	4.63	3.51	4.05	8.27	8.8
CTRG_00035	1371	16.38	17.73	28.11	15.45	20.78	20.79
CTRG_00036	1392	16.27	24.35	24.77	12.44	50.06	85.49
CTRG_00037	1674	0.66	1.42	0.59	0.13	6.67	17.12
CTRG_00038	1113	3.08	1.54	6.98	1.76	4.02	7.65
CTRG_00039	1425	6.44	8.59	7.72	4.34	5.72	5.85
CTRG_00040	1704	9.88	29.4	15.39	2.68	71.32	63.25
CTRG_00041	660	0	0.89	1.82	0	26.59	16.25
CTRG_00042	1833	0	0.13	1.18	0	2.7	1.73
CTRG_00043	5406	14.82	17.18	49.8	24.08	29.71	64.93
CTRG_00044	159	488.59	366.22	225.4	547.71	503.06	184.1
CTRG_00045	3732	38.26	44.65	70.84	62.97	79.29	124.88
CTRG_00046	735	338.51	465.93	647.56	298.77	795.72	1625.9
CTRG_00047	2946	15.04	22.52	42.35	23.42	24.49	44.48
CTRG_00048	1176	3.86	5.81	4.49	4.23	6.85	10.48
CTRG_00049	363	3.86	2.58	1.4	3.62	45.56	19.4
CTRG_00050	552	13.21	16.32	5.53	7.76	342.4	233.88
CTRG_00051	1689	19.8	49.16	9.53	2.8	10.78	21.94
CTRG_00052	396	5.51	23.67	6.85	4.53	19.08	4.17
CTRG_00053	10245	0.62	0.72	7.57	1.74	5.21	10.58
CTRG_00054	1359	0.33	4.79	24.38	4.1	5.55	33.86
CTRG_00055	1104	39.12	41.83	103.9	64.05	43.61	85.29
CTRG_00056	1170	14.18	53.01	50.75	28.5	31.71	63.23
CTRG_00057	1581	12.52	15.36	11.06	9.39	16.54	36.16
CTRG_00059	768	0	0.34	0	0.29	0.29	0.26
CTRG_00060	1656	41.78	65.76	65.67	69.62	76.39	60.34
CTRG_00061	4656	26.2	43.83	74.07	31.85	48.1	99.62
CTRG_00062	495	73.81	100.94	44.97	51.07	559.15	443.36
CTRG_00063	2979	24.52	19.4	27.11	26.82	72.82	99.14
CTRG_00064	876	10.69	6.63	8.14	8.64	58.47	72.68
CTRG_00066	1116	20.46	43.97	31.85	26.3	40.43	29.66
CTRG_00067	1299	8.16	23.45	18.31	8.6	17.81	15.87
CTRG_00068	1134	18.7	19.87	14.93	10.34	17.05	10.74
CTRG_00069	2196	5.67	8.82	11.82	3.99	6.97	4.71
CTRG_00070	3039	13.86	19.01	25.16	13.38	22.85	32.35
CTRG_00071	570	230.53	338.19	143.52	212	169.61	151.6
CTRG_00072	1890	22.02	27.14	56.58	29.57	66.47	106.95
CTRG_00074	612	18.53	14.48	15.93	30.54	30.31	10.68
CTRG_00075	477	10.34	16.14	13.73	5.14	17.13	3.27
CTRG_00076	1929	9.92	15.23	15.78	7.4	14.06	15.21
CTRG_00077	1293	0	0.19	2.18	1	0	0.44
CTRG_00078	1953	0.68	0.84	0	0.43	0.63	1.24
CTRG_00079	966	75.98	81.85	65.03	47.88	60.51	80.99
CTRG_00080	2889	14.9	15.32	19.64	12.02	24	49.88
CTRG_00081	612	211.91	214.52	215.48	256.13	249.55	120.56
CTRG_00082	483	58.93	90.61	51.67	65.26	95.28	57.56
CTRG_00084	3057	30.09	36.35	67.66	40.49	66.82	111.83
CTRG_00085	1239	22.28	20.38	19.27	20.18	27.25	25.21
CTRG_00086	1350	71.76	82.65	89.45	58.72	59.8	74.41
CTRG_00087	453	23.79	67.74	28.79	25.72	49.4	64.93
CTRG_00088	2034	25.35	24.77	38.22	25.74	44.42	68.11
CTRG_00089	1032	3.34	3.12	10.97	7.42	8.93	7.94
CTRG_00090	1593	5.44	8.21	5.73	5.59	7.03	15.81
CTRG_00091	1443	62.95	57.97	45.03	45.08	58.01	56.14
CTRG_00092	510	276.62	302.61	129.57	167.67	173.26	136.79
CTRG_00093	663	40.36	43.05	31.31	35.49	57.96	41.34
CTRG_00094	2460	27.95	29.34	71.73	50.34	119.99	204.23
CTRG_00095	2019	2.5	5.92	6.21	3.73	7.41	11.93
CTRG_00096	1344	0.17	0.36	2.09	0	3.28	6.09
CTRG_00097	366	3.05	1.7	4.84	3.58	11.97	3.31
CTRG_00098	666	15.51	26.56	37.21	34.27	79.88	45.33
CTRG_00099	852	8.41	19.79	33.6	11	68.9	101.73
CTRG_00100	2238	32.01	42.71	31.79	6.43	14.68	17.71
CTRG_00101	720	153.45	141.02	98.8	98.47	96.47	140.2
CTRG_00102	513	0	0	0	0	0	0.85
CTRG_00103	1170	89.77	106.65	87.77	85.87	88.78	115.76
CTRG_00104	738	96.96	184.78	132.98	128.99	146.28	94.51
CTRG_00105	2295	5.42	6.8	10.1	8.17	8.35	13.96
CTRG_00106	1377	20.54	19.74	24.48	18.33	28.9	35.59
CTRG_00107	1575	8.62	17.39	22.33	14.41	22.15	15.88
CTRG_00108	666	15.51	26.56	37.21	34.27	79.88	45.33
CTRG_00109	852	8.41	19.79	33.6	11	68.9	101.73
CTRG_00110	1734	0.64	3.27	7.75	3.04	5.6	3.23
CTRG_00111	885	2.38	9.12	6.15	8.04	8.86	15.04
CTRG_00112	1338	10.93	11	10.07	21.63	19.92	18.36
CTRG_00113	1272	1.6	3.62	1.11	0.17	7.29	12.93
CTRG_00114	2526	27.97	39.1	37.54	29.67	51.22	84.56
CTRG_00115	693	34.16	54.84	24.72	33.4	35.65	45.79
CTRG_00116	1056	19.12	19.63	15.17	23.58	23.69	14.38
CTRG_00117	2937	11.26	23.54	38.67	21.45	42.66	60.52
CTRG_00118	1305	15.37	14.63	17.75	12.34	17.24	20.76
CTRG_00119	1047	327.92	283.64	217.72	295.42	222	255.11
CTRG_00120	1242	14.94	14.86	11.89	17.01	15.97	16.66
CTRG_00121	3489	27.38	24.03	32.93	19.8	25.65	43.07
CTRG_00122	2523	39.2	73.23	101.69	50.69	78.33	133.29
CTRG_00123	1824	74.13	45.63	58.63	73.51	84.35	83.57
CTRG_00124	1599	7.51	5.65	10.93	10.87	8.82	10.22
CTRG_00125	1248	4926.11	5668.1	5129.03	5723.11	7612.77	7023.7
CTRG_00126	2223	21.33	16.47	18.86	20.08	20.66	26.21
CTRG_00127	825	382.96	267.43	282.08	413.34	453.01	348.17
CTRG_00128	456	292.86	584.15	335.86	502.08	817.49	555.23
CTRG_00129	873	302.02	343.92	298.04	259.33	241.5	273.16
CTRG_00130	726	8.92	15.04	5.34	5.65	8.3	5.63
CTRG_00131	1194	7.6	12.86	10.71	4.35	3.72	2.42
CTRG_00132	723	17.93	26.27	26.82	25.52	19.14	10.19
CTRG_00133	951	5.61	6.31	6.33	9.97	5.22	7.04
CTRG_00134	1518	0	0.31	0.13	0	0.14	0.5
CTRG_00135	2628	1.82	3.79	9.43	5.68	6.71	17.69
CTRG_00136	1905	98.2	99.01	89.63	75.52	89.76	117.09
CTRG_00137	1308	0.52	0.55	0	0	0.64	1.6
CTRG_00138	2427	2.42	3.44	2.48	3.17	10.48	6.43
CTRG_00139	1335	8.76	9.76	15.97	8.83	4.87	10.27
CTRG_00140	1419	7.89	17.08	10.3	8.88	8.98	6.01
CTRG_00141	4107	1.51	2.33	6.7	1.65	5.61	15.91
CTRG_00142	522	1.95	14.94	17.99	0.92	35.23	34.69
CTRG_00143	2445	0	0	0.4	0.09	1.83	1.95
CTRG_00144	315	1.87	8.43	12.75	2.63	7.75	4.9
CTRG_00145	738	442.65	431.05	293.89	469.8	503.1	517.03
CTRG_00146	639	205.28	235.32	115.28	120.9	99.27	103.39
CTRG_00147	912	22.48	28.93	22.88	30.37	25.7	24.31
CTRG_00148	369	0	0	0	0	0	1.31
CTRG_00149	1884	78.43	42.34	75.97	79.19	57.08	36.92
CTRG_00150	4056	13.79	14.45	20.72	17.73	17.19	19.45
CTRG_00151	723	27.22	37.42	34.56	41.28	35.51	39.05
CTRG_00152	522	754.6	825.71	866.94	1174.99	1008.16	795.75
CTRG_00153	1980	13.2	10.67	19.11	12.18	11.91	9.09
CTRG_00154	600	5759.79	6800.77	9461.09	7383.44	10301	13892.5
CTRG_00155	351	5419.53	5059.21	7318.46	6784.28	7560.14	6134.6
CTRG_00156	3336	2.44	9.08	16.54	5.44	82.65	154.17
CTRG_00157	345	12.81	22.18	46.8	36.8	208.23	271.26
CTRG_00158	444	0.59	2.62	4.3	2.8	8.81	10.25
CTRG_00159	402	1563.25	1884.16	1352.57	2086.14	1109.22	1475.47
CTRG_00160	1056	0	0.7	0	0.83	1.01	0.74
CTRG_00161	345	12.81	22.18	46.8	36.8	208.23	271.26
CTRG_00162	3336	4.86	17.87	6.49	1.59	24.89	40.79
CTRG_00163	3330	7.05	12.26	24.51	10.38	17.35	23.88
CTRG_00164	2157	22.11	31.73	27.25	23.72	27.57	53.08
CTRG_00165	1134	145.34	202.62	96.94	114.29	153.87	135.3
CTRG_00166	855	313.81	333.5	261.56	283.41	212.66	201.94
CTRG_00167	1377	372.31	311.35	303.05	295.52	285.31	380.05
CTRG_00168	1005	21.57	44.21	33.28	38.64	31.64	21.22
CTRG_00169	930	1741.82	1664.54	1251.6	1680.92	2147.17	2516.64
CTRG_00170	564	0.89	0.97	1.6	0	2.88	0
CTRG_00171	858	5.47	2.66	17.16	22.88	24.95	46.04
CTRG_00172	1941	8.38	13.07	22.05	12.11	16.4	22.1
CTRG_00173	798	6.82	13.48	6.39	11.84	1.93	4.29
CTRG_00174	393	2.09	0.77	0	0.65	0	0
CTRG_00175	1797	0.49	0.66	0.11	0.35	1.15	2.39
CTRG_00176	2211	15.62	22.89	23.38	15.57	21.24	42.13
CTRG_00177	1536	13.35	39.6	46.14	22.82	19.77	37.78
CTRG_00178	1521	10.85	17.89	13.75	12.86	10.94	22.56
CTRG_00179	1212	88.84	107.62	81.46	51.67	56.68	74.94
CTRG_00180	387	328.48	467.18	487.65	406.22	312.44	239.33
CTRG_00181	906	432.6	559.27	378.55	410.64	310.6	347.9
CTRG_00182	3327	9.91	13.72	23.03	11.51	11.68	25.43
CTRG_00184	396	0.69	0	0	0	0.64	1.19
CTRG_00185	1785	24.5	22.09	27.95	12.63	20.79	17.25
CTRG_00186	3729	0.4	0.31	4.21	1.21	4.52	12.91
CTRG_00187	6054	4.15	6.35	21.88	8.47	14.95	33.71
CTRG_00188	372	8.97	12.48	5.41	10.53	13.1	7.12
CTRG_00189	648	17.71	26.21	13.2	15.72	16.1	15.12
CTRG_00190	1365	84.08	86.61	70.3	77.79	96.25	95.25
CTRG_00191	1779	105.54	168.58	197.57	157.2	172.96	122.21
CTRG_00192	672	28.53	43.93	19.14	22.27	36.26	35.45
CTRG_00193	1275	11.86	10.83	11.72	15.18	16.52	27.14
CTRG_00194	2595	127.44	131.61	194.84	107.73	150.05	189.79
CTRG_00195	1155	11.63	24.34	15.34	17.64	12.49	10.35
CTRG_00196	810	105.62	245.06	208.75	150.8	215.06	295.45
CTRG_00197	519	12502.8	9766.48	6735.96	10320.3	8867.73	4585.59
CTRG_00198	966	784.94	622.77	704.39	646.2	608.89	389.09
CTRG_00199	1266	3.57	15.7	18.03	5.95	13.81	14.96
CTRG_00200	2772	9.77	13.66	13.38	8.59	8.76	11.66
CTRG_00201	1449	14.51	12.73	24.41	13.24	20.89	20.63
CTRG_00202	3363	15.75	24.21	23.29	19.64	19.63	25.9
CTRG_00203	1137	11.43	19.17	13.09	19.47	11.4	22.77
CTRG_00204	639	59.36	72.89	49.21	41.03	38.07	47.77
CTRG_00205	1350	34.47	49.45	35.42	30.79	43.96	76.39
CTRG_00206	201	294.25	291.58	194.9	300.47	153.95	154.23
CTRG_00207	2310	185	225.72	336.72	203.69	336.74	450.62
CTRG_00209	2100	37.55	52.79	32.12	50.88	41.89	57.68
CTRG_00210	336	21.42	78.7	46.59	29.69	18.14	21.59
CTRG_00211	936	17461.9	15084.2	15237	13299.7	10344.5	8918.44
CTRG_00213	543	273.12	300.64	127.94	200.81	162.43	177.56
CTRG_00214	774	363.07	431.76	315.46	259.64	250.64	85.53
CTRG_00215	975	32.03	36.8	29.74	29.79	24.75	30.41
CTRG_00216	543	0.46	0.51	1.25	0.88	1.72	6.37
CTRG_00217	2472	6.25	8.35	8.95	8.91	12.66	33.41
CTRG_00218	975	82.32	96.59	79.87	82.83	64.98	48.34
CTRG_00219	972	1.67	6.15	11.51	8.61	9.09	36.58
CTRG_00220	741	84.89	159.44	90.94	76.92	130.6	161.18
CTRG_00221	1809	0	0.26	0.22	0.12	0.11	0.1
CTRG_00222	2445	0.98	4.65	0.32	1.62	2.91	5.41
CTRG_00223	753	20.6	27.11	15.64	15.65	55.42	60.75
CTRG_00224	279	273.95	257	140.81	229.06	141.88	82.88
CTRG_00225	1689	11.94	10.1	12.07	9.88	14.57	10.42
CTRG_00226	999	1571.87	1653.82	1552.83	1840.33	2241.89	2290.72
CTRG_00227	558	119.58	95.26	60.28	105.08	78	75.09
CTRG_00228	1329	24.21	34.32	17.71	20.01	26.22	35.12
CTRG_00229	903	23.76	30.92	21.75	26.28	25.5	28.31
CTRG_00230	1296	126.65	113.83	90.52	107.1	107.75	111.65
CTRG_00231	1332	21.28	17.93	12.08	21.25	50.58	68.35
CTRG_00232	1443	0.16	0.33	0	0	0.72	1.31
CTRG_00233	4152	0.26	0.05	0.28	0.1	0.82	1.39
CTRG_00234	1590	1.4	0.3	0.75	0.67	2.22	5.79
CTRG_00235	1014	301.03	352.89	175.11	216.86	244.1	271.46
CTRG_00236	936	29.78	27.29	24.01	13.93	28.9	42.58
CTRG_00237	375	14.79	5.76	4.01	3.47	8.87	17.93
CTRG_00238	1287	3.51	4.51	7.99	3.17	7.85	11.58
CTRG_00239	690	374.14	340.24	223.01	362.61	264.44	306.03
CTRG_00240	237	35.63	44.45	27.33	3.95	29.91	10.06
CTRG_00241	3609	6.61	13.25	25.91	10.13	24.72	72.91
CTRG_00242	1662	14.54	18.41	11.44	10.18	11.33	13.31
CTRG_00243	1887	6.3	6.48	11.25	7.13	27.57	32.43
CTRG_00244	3279	0.39	1.33	3.75	1.63	2.4	4.26
CTRG_00245	1416	4.59	7.63	6.93	8.29	13.73	31.06
CTRG_00246	1089	27.94	47.44	31.02	25.8	31.92	21.2
CTRG_00247	1854	67.4	63.27	67.61	76.34	87.8	107.74
CTRG_00248	300	30.44	13.14	46.47	42.12	66.94	61.86
CTRG_00249	2304	25.16	26.06	24.72	16.39	45.41	38.95
CTRG_00250	1545	13.55	10.8	11.85	14.02	20.85	35.47
CTRG_00251	1005	27.07	24.95	18.08	20.96	42.54	58.42
CTRG_00252	1155	62.86	79.17	84.44	43.35	65.41	64.3
CTRG_00253	474	77.86	62.08	44.99	90.58	84.29	54.22
CTRG_00254	2226	5.79	13.93	23.91	9	67.85	280.81
CTRG_00255	2517	3.45	8.11	8.32	0.49	3.23	16.54
CTRG_00256	1701	51.81	60.57	61.27	19.75	37.67	24.31
CTRG_00257	2145	4.92	4.15	17.34	13.99	9.02	5.04
CTRG_00258	300	39.77	29.93	0	0	62.01	55.46
CTRG_00259	3543	47.64	61.58	212.93	86.19	124.31	133.12
CTRG_00260	1284	490.81	375.33	417.77	418.61	518.12	465.43
CTRG_00261	768	28.51	61.71	39.75	42.38	32.58	33.25
CTRG_00262	183	967.33	998.28	619.23	1241.99	1037.56	386.29
CTRG_00263	1422	274.35	212.62	208.73	270.25	767.08	1235.24
CTRG_00264	900	15.56	12.58	14.17	25.15	61.08	99.8
CTRG_00265	642	0.38	8.28	45.52	11.92	19.11	6.51
CTRG_00266	558	0.9	4.42	32.36	0.85	19.6	8.86
CTRG_00267	789	0	8.13	25.07	4	16.5	5.88
CTRG_00268	621	0.4	6.47	21.36	3	10.3	5.42
CTRG_00269	747	165.99	229.64	121.38	177.34	205.27	97.01
CTRG_00270	324	21.61	7.08	14.7	41.29	21.54	10.97
CTRG_00271	2670	21.61	20.01	30.95	22.19	29.38	43.3
CTRG_00272	828	27.61	26.14	16.07	21.91	41.59	37.05
CTRG_00273	645	2.65	7.41	5.79	7.9	11.97	17.47
CTRG_00274	2631	18.56	26.74	34.88	22.06	47.79	70.48
CTRG_00275	1668	2.66	1.56	5.46	2.28	6.33	6.74
CTRG_00276	807	117.49	97.56	100.61	121.09	142.06	135.89
CTRG_00277	2451	24.68	30.31	43.41	17.72	26.13	58.72
CTRG_00278	1053	18.96	29.54	50.33	19.92	34.54	41.6
CTRG_00279	1032	9.14	11.99	12.17	7.64	15.16	9.08
CTRG_00280	1740	2.41	1.9	3.41	2.43	17.32	19.01
CTRG_00281	219	132.53	133.72	79.88	188.98	130.96	103.1
CTRG_00282	2538	12.93	24.57	37.13	23.96	26.32	19.57
CTRG_00283	2655	34.65	55.76	65.32	49.1	77.89	143.97
CTRG_00284	660	3.32	10.02	14.91	16.11	353.72	301.35
CTRG_00285	909	38.2	47.84	62.02	55.84	38.44	80.39
CTRG_00286	4428	1.5	2.36	4.35	2.03	8.13	12.08
CTRG_00287	1923	105.36	65.63	86.4	110.59	233.1	181.72
CTRG_00288	399	1.36	1.51	0.62	5.13	33.38	7.66
CTRG_00289	609	0	0.88	1.46	0.38	4.89	0.35
CTRG_00290	1080	16.96	27.81	32.25	31.89	45.65	67.25
CTRG_00291	1971	0.22	0	0	0.32	1.25	0.94
CTRG_00292	1368	2.41	2.99	6.62	5.97	12.25	9.9
CTRG_00293	1023	3.23	9.93	0	0.08	0	0
CTRG_00294	1788	0.25	0	0.77	0.24	1.04	0.21
CTRG_00295	1023	0.22	0	0.2	0	0.42	1.53
CTRG_00296	1047	0	0	0	0	0	0.56
CTRG_00297	999	0.92	0.99	0.62	0.22	2.15	2.16
CTRG_00298	600	0	0	0	0	8.04	14.11
CTRG_00299	609	631.72	893.21	528.57	426.9	1012.23	1255.28
CTRG_00300	447	1.18	9.1	0	1.67	5.46	5.59
CTRG_00301	1530	0	0	0.65	0.42	1.09	0.37
CTRG_00302	591	1.68	4.58	3.02	4.77	1.95	8.62
CTRG_00303	2493	0	1.86	1.79	0.33	0.65	4.12
CTRG_00304	1098	6.66	6.49	3.35	0.79	2.52	9.18
CTRG_00305	609	228.13	177.41	101.27	221.51	175.35	189.87
CTRG_00306	984	32.88	30.35	25.44	40.44	44.42	35.88
CTRG_00307	660	26.92	70.13	37.77	57.71	39.07	32.12
CTRG_00308	2016	18.07	22.91	22.35	23.48	30.3	32.08
CTRG_00309	594	63.43	101.43	83.68	77.08	94.92	58.91
CTRG_00310	384	115.39	94.75	77.79	110.49	115.78	73.17
CTRG_00311	915	10.94	8.78	8.89	10.65	18.02	16.44
CTRG_00312	1353	27.24	31.88	17.97	27.86	31.15	50.75
CTRG_00313	1140	14.39	6.23	10.73	8.57	9.69	11.35
CTRG_00314	1623	9.03	15.08	20.04	11.48	20.82	22.09
CTRG_00315	1383	31.31	35.3	44.09	38.82	36.78	46.41
CTRG_00316	876	35.27	45.85	38.07	52.07	44.04	43.61
CTRG_00317	4305	5.07	11.32	16.75	7.94	13.39	11.51
CTRG_00318	1212	0.56	6.22	5.85	1.25	3.66	11.41
CTRG_00319	2064	6.9	5.78	13.56	9.33	13.89	21.61
CTRG_00320	2274	25.82	35.03	43	30.89	36.41	43.5
CTRG_00321	1272	104.56	98.08	128.4	107.57	140.73	245.32
CTRG_00322	1314	41.14	86.77	71.72	65.99	89.86	53.55
CTRG_00323	441	13.8	27.13	16.79	13.01	26.65	22.23
CTRG_00324	1173	32.94	44.95	48.18	31.93	55.83	37.11
CTRG_00325	882	37.92	59.8	54.17	45.13	44.2	36.29
CTRG_00326	1383	56.46	80.52	72.22	63.41	34.06	37.21
CTRG_00327	1026	20.41	61.79	32.92	20.7	25.5	44.34
CTRG_00328	1503	1.63	2.07	2.52	2.83	9.97	16.95
CTRG_00329	894	8.88	26.49	22	19.37	37.7	53.94
CTRG_00331	447	1.77	1.95	2.66	0.56	14.74	9.15
CTRG_00332	414	23.41	20.86	28.2	11.02	14.42	26.38
CTRG_00333	1551	0.86	2.77	3.59	1.1	3.62	4.01
CTRG_00334	2589	2.1	5.1	3.74	2.96	5.33	5.66
CTRG_00336	669	218.93	224.77	175.43	214.85	608.74	444.71
CTRG_00337	609	0	0.44	1.09	0	0.38	1.39
CTRG_00338	1161	502.02	375.29	403.85	366.71	456.2	484.41
CTRG_00339	5424	11	14.91	32.73	17.84	27.77	70.27
CTRG_00340	5598	7.76	6.59	14.3	10.4	21.49	35.7
CTRG_00341	324	63.04	23.26	38.39	63.19	68.76	55.64
CTRG_00342	2001	113.34	164.89	236.14	162.74	371.87	791.36
CTRG_00343	600	2.47	11.23	8.9	5.47	43.65	29.28
CTRG_00344	1383	28.23	30.95	20.74	19.02	54.65	53.69
CTRG_00345	2535	27.35	42.24	64.02	43.48	45.02	82.73
CTRG_00346	1218	0.93	2.4	1.16	0.89	2.78	2.99
CTRG_00347	999	2.77	4.72	2.69	1.1	3.01	6.08
CTRG_00348	576	0	0	0.39	0	22.5	95.59
CTRG_00350	675	425.17	222.01	164.34	426.05	193.26	161.89
CTRG_00351	561	0.8	0	0.7	80.31	63.57	23.76
CTRG_00352	957	371.73	247.36	150.07	365.15	854.33	1211.43
CTRG_00353	3294	11.71	18.74	18.61	14.5	24.58	27.01
CTRG_00354	861	24.52	45	41.75	30.3	25.36	20.85
CTRG_00355	1686	63.86	60.58	58.91	67.56	82.31	94.84
CTRG_00356	2184	9.51	10.26	16.08	17.68	22.35	17.41
CTRG_00357	1305	7.25	7.59	14.2	12.84	22.71	26.02
CTRG_00358	1098	13.33	33.13	38.94	34.69	26.59	23.84
CTRG_00359	771	104.59	158.93	84.68	84.09	75.78	94.06
CTRG_00360	1725	7.82	12.62	11.34	8.2	11.74	16.58
CTRG_00361	732	9.17	10.99	9.11	6.21	13.09	20.09
CTRG_00362	1431	114.2	120.34	124.98	99.62	111.52	99.13
CTRG_00363	1302	244.26	195.52	215.74	250.09	278.39	358.35
CTRG_00364	1023	98.1	185.97	171.8	120.77	166.9	142.81
CTRG_00365	648	107.76	127.79	93.43	140.75	113.08	110.05
CTRG_00366	2676	3.16	2.94	5.42	2.94	5.53	8.41
CTRG_00367	1371	10.15	16.33	13.32	8.9	12.38	16.08
CTRG_00368	1446	4.02	11.77	9.4	11.06	20.93	29.84
CTRG_00369	1905	20.22	28.15	32.39	25.47	30.32	29.66
CTRG_00370	486	350.34	296.55	195.04	265.6	211.77	189.61
CTRG_00371	525	115.14	153.58	102.82	123.97	82.54	77.19
CTRG_00372	2037	85.61	80.97	93.14	74.62	86.8	102.1
CTRG_00373	1767	250.6	475.05	643.2	274.65	365.55	569.17
CTRG_00374	615	21577	16974.9	12338.9	16960.8	13010	8815.65
CTRG_00375	1779	5.59	9.69	19.73	9.12	8.93	4.62
CTRG_00376	2808	8.64	16.77	16.85	12.96	10.23	14.63
CTRG_00377	1506	31.4	28.39	46.59	43.08	36.63	31.32
CTRG_00378	1386	96.96	167.25	176.8	80.08	163.86	164.38
CTRG_00379	927	14.55	13.52	10.34	13.6	28.04	30.9
CTRG_00380	1401	34.56	66.54	81.8	59.95	73.16	62.02
CTRG_00381	1872	61.19	83.75	139.94	80.96	82.63	80.51
CTRG_00382	2331	31.43	28.95	39.65	31.17	43.43	64.09
CTRG_00383	1548	70.49	98.26	117.73	85.33	126.88	202.06
CTRG_00384	1206	591.17	601.59	554.95	560.99	720.5	613.15
CTRG_00385	1545	172.56	282.88	298.28	153.28	129.97	238.19
CTRG_00386	483	54.1	59.43	36.22	47.55	13.89	26.25
CTRG_00387	861	58.84	52.05	43.94	45.83	53.77	54.89
CTRG_00388	3129	33.45	58.11	86.1	47.9	56.14	66.79
CTRG_00389	1362	0	0.18	0.15	0	0.46	0.14
CTRG_00390	291	244.11	205.3	113.31	207.05	124.02	72.34
CTRG_00391	486	8.51	18.1	10.54	7.53	9.85	11.42
CTRG_00392	1638	20.19	29.43	21.06	15.12	18.46	24.85
CTRG_00393	711	31.47	30.46	41.31	37.26	37.76	57.43
CTRG_00394	1533	2.76	8.25	9.48	4.71	56.44	94.9
CTRG_00395	963	6.25	6.48	6.89	6.18	38.09	50.03
CTRG_00396	2145	97.33	112.4	195.49	118.43	124.65	94.99
CTRG_00397	693	37.99	53.71	41	39.69	40.83	42.82
CTRG_00398	1788	22.48	25.22	39.48	22.51	33.32	35.48
CTRG_00399	2865	95.17	105.61	144.5	93.29	125.36	166.98
CTRG_00400	1008	8.46	14.77	13.92	10.23	12.79	7.57
CTRG_00401	480	427.54	493.45	326.09	487.81	364.01	243.64
CTRG_00402	1353	10.8	15.32	16.04	13.3	8.37	11.81
CTRG_00403	3180	43.75	58.38	106.82	63.96	124.64	170.13
CTRG_00404	1173	23.06	26.01	28.08	20.3	24.03	20.03
CTRG_00405	1647	10.37	12.68	14.44	7.84	9.43	22.43
CTRG_00406	552	278.63	321.66	476.05	405.77	192.11	180.24
CTRG_00407	642	596.55	725.87	1415.3	1085.58	610.91	538.49
CTRG_00408	375	17.75	30.43	72.93	18.06	2369.49	4309.28
CTRG_00409	366	14.51	56.99	96.76	18.64	2690.82	5180.04
CTRG_00410	2385	39.28	46.48	68.14	45.79	56.41	66.74
CTRG_00411	786	36.83	26.45	33.03	24.95	27.81	25.95
CTRG_00412	954	3.4	4.71	6.31	7.17	6.11	3.3
CTRG_00413	1122	42.3	52.02	60.77	51.51	34.13	73.1
CTRG_00414	1452	1970.65	1306.53	1958.21	2633.11	2004.3	2269.04
CTRG_00415	390	136.26	174.63	118.77	114.26	132.3	175.53
CTRG_00416	402	15.53	26.19	21.36	20.33	21.83	21
CTRG_00417	1125	79.49	103.95	91.25	46.73	71.65	36.44
CTRG_00418	1092	126.73	122.29	178.82	136.21	151.32	165.37
CTRG_00419	624	215.4	383.12	275.7	225.78	250.55	190.82
CTRG_00420	831	248.32	196.62	175.33	282.05	227.45	231.73
CTRG_00421	612	209.9	244.79	149.21	162.61	179.59	132.27
CTRG_00422	1998	20	25.24	26.98	27.48	34.89	42.87
CTRG_00423	2133	0	0	0.09	0	0.58	0.87
CTRG_00424	456	10.93	3.8	4.15	5.97	58.05	36.16
CTRG_00425	1281	0	0.57	0	0	0.49	1.19
CTRG_00426	3270	6.99	7.37	9.34	5.42	8.93	12.05
CTRG_00427	909	6.41	14.1	9.65	8.29	4.54	5.23
CTRG_00428	1722	25.83	32.43	41.2	20.47	40.07	51.58
CTRG_00429	2742	7.59	11.63	16	8.98	13.29	17.4
CTRG_00430	3951	23.99	31.02	55.06	27.03	59.01	113.98
CTRG_00431	939	2.72	1.87	15.28	6.82	20.04	44.53
CTRG_00432	975	1.19	2.04	4.89	0.68	2.65	4.63
CTRG_00433	858	57.7	75.59	64.7	63.95	67.73	53.95
CTRG_00434	1008	198.04	201.87	401.47	299.23	385.69	440.94
CTRG_00435	2289	4.1	5.7	8.51	6.74	12.74	28.48
CTRG_00436	1341	49.81	45.49	40.78	48.11	62.74	90.99
CTRG_00437	660	115.81	90.16	69.9	109.82	125.79	93.84
CTRG_00438	2301	25.51	31.57	44.84	29.33	54.21	78.65
CTRG_00439	375	0	0	0.67	0	0	0
CTRG_00441	1152	69.56	88.53	78.13	86.01	119.39	79.05
CTRG_00442	1122	60.81	59.45	57.31	56.35	66.36	57.76
CTRG_00443	1650	31.73	35.1	62.68	52.71	105.42	111.25
CTRG_00444	966	72.86	76.68	71.9	78.21	100.03	122.91
CTRG_00445	1026	57.86	52.62	57.02	67.66	97.39	129.98
CTRG_00446	537	6490.64	4621.13	2028.35	4450.9	3883.18	1924.33
CTRG_00447	1107	1.24	4.88	6.65	2.75	46.17	49.34
CTRG_00448	522	43.84	84.81	48.26	45.6	66.85	62.27
CTRG_00449	582	362.12	371.65	258.79	360.3	278.2	162.83
CTRG_00450	2037	3.34	6.21	12.59	6.99	11.77	18.73
CTRG_00451	1242	21.86	38.31	61.08	39.39	55.72	72.2
CTRG_00452	669	39.21	44.56	46.63	56.47	55.34	36.88
CTRG_00453	234	49.44	43.73	19.92	52.37	50.4	46.21
CTRG_00454	2097	8.98	18.07	16.41	18.35	17.17	19.14
CTRG_00455	2613	27.92	28.97	45.43	27.22	50.54	63.49
CTRG_00456	4314	5.9	5.12	15.3	9.63	11.09	24.65
CTRG_00457	2619	0.66	2.21	1.26	0.24	5.03	9.79
CTRG_00458	1929	8.32	7.19	6.11	3.37	10.22	24.46
CTRG_00459	1503	4.9	2.86	0.93	1.27	3.6	3.01
CTRG_00460	1551	255.98	269.1	236.77	200.44	206.08	223.37
CTRG_00461	1629	4.22	21.29	46.26	10.14	13.86	55.87
CTRG_00462	660	5.16	10.02	36.77	13.64	9.94	53.53
CTRG_00463	420	0	0	0	0	0.01	0
CTRG_00464	1425	15.24	50.51	80.89	31.16	21.7	98.65
CTRG_00465	486	14.89	21.02	18.69	17.07	23.15	22.84
CTRG_00466	492	65.46	90.23	67.96	73.21	74.72	45.44
CTRG_00467	1779	1.12	4.65	5.54	3.91	4.52	9.86
CTRG_00468	480	0	0.59	4.38	0	0.5	1.86
CTRG_00469	660	254.86	293.33	220.97	283.3	255.35	196.17
CTRG_00470	963	156.57	232.67	150.76	181.21	194.7	147.03
CTRG_00471	654	0	0	0.67	0	0.69	0.95
CTRG_00472	927	13.8	24.34	35.28	26.01	26.4	27.7
CTRG_00473	969	30.1	35.51	59.03	37.72	64.09	54.55
CTRG_00474	1728	23.3	30.67	31.56	25.41	32.75	63.4
CTRG_00475	2115	0.1	0.22	0	0	1.45	1.92
CTRG_00477	2790	0.93	2.15	28.18	28.4	8.27	26.71
CTRG_00478	3033	0	0.15	0	0	0.4	0.42
CTRG_00479	2361	10.43	10.93	22.24	11.9	23.63	39.72
CTRG_00480	2892	6.28	12.68	17.55	9.5	11.4	24.85
CTRG_00481	2481	23.5	23.1	29.49	23.44	29.82	49.26
CTRG_00482	402	0.68	0	0	0	0	0
CTRG_00483	1068	16.1	13.39	10.95	11.24	16	16.57
CTRG_00484	1089	26.47	55.34	38.35	28.8	49.55	118.66
CTRG_00485	2043	139.99	108.81	122.37	107.8	137.47	126.08
CTRG_00486	1047	16.67	21	23.17	8.56	15.94	12.09
CTRG_00487	531	0	0.52	0.43	0	0.44	0.8
CTRG_00488	1053	18.09	37.28	26.34	17.01	67.65	141.08
CTRG_00489	2394	15.38	29.02	44.24	27.11	35.02	29.55
CTRG_00490	708	54.75	36.14	32.05	42.92	30.99	24.36
CTRG_00491	663	46.23	80.11	62.28	44.19	93.08	114.95
CTRG_00492	2313	23.2	41.86	50.91	39.08	41.76	36.21
CTRG_00493	2001	0.11	0	0.39	0.42	1.23	1.2
CTRG_00494	1473	33.37	44.67	48.11	49.31	58.46	41.31
CTRG_00495	1698	22.69	42.55	75.48	57.61	50.65	50.04
CTRG_00496	1608	100.17	115.03	128.36	106.35	122.52	188.41
CTRG_00497	1023	12.15	20.1	30.82	27.84	19.71	32.07
CTRG_00498	978	71.17	121.72	96.53	85.7	61.68	108.19
CTRG_00499	447	25.96	39.66	56.96	35.6	14.19	18.29
CTRG_00500	573	5.23	14.73	3.53	4.54	15.76	29.46
CTRG_00501	906	77.2	80.77	70.78	96.91	125.82	119.17
CTRG_00502	771	211.65	257.09	128.68	157.64	155.58	174.98
CTRG_00503	1755	5.92	5.12	7.65	5.89	5.88	7.56
CTRG_00504	1911	23.26	18.33	21.28	21.98	20.65	23.92
CTRG_00505	1350	0.5	0.71	0.45	0.48	1.24	1.13
CTRG_00506	465	0.56	8.65	12.16	4.24	3.64	5.8
CTRG_00507	2172	52.46	89.01	103.98	53.55	74.12	127.75
CTRG_00508	1326	3.73	15.29	6.83	10.19	8.87	11.5
CTRG_00509	1059	13.65	16.78	11.24	16.08	30.08	35.46
CTRG_00510	888	36.84	64.74	74.04	76.07	58.08	65.31
CTRG_00511	3717	32.24	40.72	69.59	45.83	55.1	83
CTRG_00512	1596	87.6	5.51	2.99	265.39	284.43	13.78
CTRG_00513	1521	86.92	5.34	12.7	209.52	182.35	11.4
CTRG_00514	1446	10.52	0.17	0.14	32.3	39.12	1.05
CTRG_00515	1497	153.41	0	0.13	180.82	198.26	0.63
CTRG_00516	288	80.82	136.23	81.21	67.39	92.68	90.19
CTRG_00517	1419	333.22	462.07	497.68	312.09	396.34	682.2
CTRG_00518	861	28.88	24.12	22.95	24.08	18.77	19.92
CTRG_00519	237	5.7	0	0	19.76	80.62	22.63
CTRG_00520	747	11287.1	10562.3	8024.06	10336.4	8446.26	5292.59
CTRG_00521	1704	25.73	39.47	30.98	29.38	18.8	19.44
CTRG_00522	4107	24.41	29.25	50.69	29.07	38.04	75.31
CTRG_00523	333	367.7	547.35	323.15	353.26	878.15	521
CTRG_00524	4005	71.03	187.58	290.01	113.06	117.55	236.03
CTRG_00525	270	32.72	77.29	39.36	40.19	33.18	9.22
CTRG_00526	1614	5.92	11.63	11.68	7.74	16.7	27.81
CTRG_00527	630	35.05	29.66	24.15	41.34	52.09	39.26
CTRG_00528	447	227.12	230.82	143.21	200.27	194.33	136.68
CTRG_00529	2616	4.9	7.17	9.92	10.78	6.13	9.94
CTRG_00530	1764	17.16	23.98	43.07	25.1	29.47	31.97
CTRG_00531	2046	7.07	11.56	13.01	9.92	13.12	26.25
CTRG_00532	1506	24.44	25.38	26.6	43.93	60.97	41.34
CTRG_00533	1107	255.49	295.04	161.76	189.23	217.01	269.11
CTRG_00534	1137	0.2	0	36.53	6.54	2.24	2.71
CTRG_00535	792	1253.03	1405.34	951.37	1093.65	1081.61	1050.57
CTRG_00536	711	0	0	0	0	0.63	2.6
CTRG_00537	831	32.32	37.36	28.71	40.14	354.63	299.73
CTRG_00538	2700	13.25	12.67	17.41	18.26	36.7	58.04
CTRG_00539	2880	17.13	21.94	25.46	19.09	23.17	36.48
CTRG_00540	1059	6.07	10.02	9.5	9.28	7.87	12.49
CTRG_00541	1233	33.23	27.39	31.85	51.59	64.03	69.66
CTRG_00542	993	28.13	43.81	53.91	50.44	81.67	59.79
CTRG_00543	1113	13.75	14.55	20.93	16.21	21.42	28.35
CTRG_00544	633	0.77	0	1.39	1.1	1.8	0.33
CTRG_00546	912	16.61	24.79	18.99	21.14	26.41	24.31
CTRG_00547	1137	1.4	1.72	21.93	3.96	0	0.86
CTRG_00548	276	105.22	133.89	99.85	115.78	127.52	52.53
CTRG_00549	735	41.05	64.59	53.5	37.11	98.48	167.14
CTRG_00550	903	74.13	89.99	58.31	55.02	68.8	81.43
CTRG_00551	2784	16.03	25.63	35.53	21.33	37.81	62.85
CTRG_00553	3978	6.36	8.03	17.39	4.28	7.96	13.3
CTRG_00554	1728	0.64	0.62	1.75	1.95	2.09	0.05
CTRG_00555	681	166.81	169.11	143.4	106.62	113.73	149.92
CTRG_00556	1119	1780.4	3981.27	3762.66	1920.6	2839.42	4034.44
CTRG_00557	2241	33.63	33.29	32.7	32.29	37.33	34.38
CTRG_00558	1728	0.64	0.62	0.88	1.95	2.09	3.63
CTRG_00559	1662	1.33	3	1.79	3.56	5.36	6.99
CTRG_00560	909	0	0.55	0	0	0	0
CTRG_00561	900	33.7	68.79	16.72	17.01	28.73	37.89
CTRG_00562	423	237.85	350.95	202.25	261.01	274.31	224.28
CTRG_00563	852	47.68	38.4	43.23	35.37	25.15	32.35
CTRG_00564	1896	20.2	24.69	33.69	31.13	83.7	92.47
CTRG_00565	1914	20	24.2	24.22	18.65	24.58	23.01
CTRG_00566	1197	3.22	8.55	5.09	3.43	5.3	7.07
CTRG_00567	2010	31.12	39.66	36.75	32.52	44.67	51.64
CTRG_00568	462	159.63	184.39	90.38	90.27	90.13	85.73
CTRG_00569	1296	1172.07	735.43	637.72	1636.95	931.49	879.69
CTRG_00570	1482	13.56	9.36	9.83	13.79	11.11	9.18
CTRG_00571	570	75.82	108.11	240.91	145.62	144.8	171.86
CTRG_00572	600	522.08	651.54	800.54	890.65	595.42	480.05
CTRG_00573	1896	4.64	5.83	15.86	8.31	23.53	29.03
CTRG_00574	1686	9.2	11.53	18.31	18.18	21.34	21.99
CTRG_00575	2148	48.9	72.22	93.1	69.24	67.94	62.26
CTRG_00576	2820	13.9	15.38	26.71	12.25	18.51	22.14
CTRG_00577	2637	14.81	24.92	26.58	20.12	13.15	21.31
CTRG_00578	1044	0.22	0.24	3.35	6.49	8.61	16.61
CTRG_00579	864	50.74	95.79	83.41	95.7	82.36	103.36
CTRG_00580	1143	1.79	17.13	7.49	4.93	2.04	2.03
CTRG_00581	873	41.04	47.48	60.57	68.34	71.18	95.54
CTRG_00582	651	22.86	24.44	43.43	34.82	93.32	110.73
CTRG_00583	516	297.41	264.1	164.65	280.22	191.91	180.18
CTRG_00584	597	339.34	775.77	977.67	1020.06	912.11	717.25
CTRG_00585	3480	19.29	34.95	65.48	36.33	49.64	59.65
CTRG_00586	1485	10.98	16.75	15.32	11.33	16.56	22.13
CTRG_00587	2457	1.42	2.83	4.11	3.47	9.27	16.14
CTRG_00588	420	0	1.41	2.88	0.6	1.77	1.1
CTRG_00589	600	6.19	6.29	3.34	5.08	223.96	181.2
CTRG_00590	795	39.04	79.6	72.68	19.53	34.11	58.59
CTRG_00591	1614	16.93	28.72	24.59	18.9	24.79	29.43
CTRG_00592	1323	22.97	48.54	43.5	49.3	36.67	38.03
CTRG_00593	579	15.49	35.66	14.7	22.4	71.07	59.65
CTRG_00594	1662	26.02	28.54	50.76	24.18	52.68	49.39
CTRG_00595	2247	17.98	38.17	64.36	36.65	38.59	32.81
CTRG_00596	678	237.02	244.91	293.74	252.63	300.72	277.92
CTRG_00597	957	58.85	66.8	37.52	43.54	122.27	112.07
CTRG_00598	915	114.54	102.65	70	99.73	87.47	79.8
CTRG_00599	1047	37.73	51.44	35.73	43.22	79.72	105.69
CTRG_00600	705	18.42	18.34	0	0	8.62	7
CTRG_00601	1653	756.93	733.56	779.26	731.61	672.89	840.65
CTRG_00602	384	10.75	36.63	18.8	30.99	19.19	8.06
CTRG_00603	1269	8.54	12.03	16.71	13.23	11.95	25.47
CTRG_00604	1134	4.22	5.4	0.54	1.34	75.53	61
CTRG_00605	705	18.49	14.65	50.92	57.4	46.67	28.85
CTRG_00606	1515	15.6	18.6	12.76	15.44	26.24	37.97
CTRG_00607	603	2.05	2.23	2.21	1.17	11.04	8.77
CTRG_00608	2079	8.01	12.49	31.43	14.49	22.94	36.22
CTRG_00609	1920	1.72	3.06	4.81	3.83	5.89	6.68
CTRG_00610	651	73.08	97.76	86.53	76.75	56.41	71.69
CTRG_00611	1869	39.02	65	76.93	61.86	60.21	80.05
CTRG_00612	1968	4.8	10.85	9.07	8.95	4.59	3.68
CTRG_00613	1710	193.79	358.18	343.49	234.28	542.16	351.06
CTRG_00614	480	39.41	12.45	4.87	11.72	10	2.32
CTRG_00615	468	22.28	12.25	1.51	8.94	9.28	2.4
CTRG_00616	648	142.05	144.18	95.46	124.32	104.68	110.7
CTRG_00617	417	324.68	335.58	270.62	325.79	307.29	275.76
CTRG_00618	2550	6.99	7	8.21	5.86	5.18	6.83
CTRG_00619	825	34.87	40.45	38.43	26.89	35.11	43.76
CTRG_00620	1053	174.6	131.31	137.73	185.49	219.81	183.05
CTRG_00621	1041	172.61	123.5	100.76	174.17	246.23	199.62
CTRG_00622	1110	28.4	36.49	30.01	39.58	32.23	42.92
CTRG_00623	1968	0	0	0	0	0.1	0.09
CTRG_00624	2688	1.53	3.87	3.67	3.39	7.77	17.21
CTRG_00625	783	69.73	131.18	86.46	80.05	82.09	46.98
CTRG_00626	1737	16.3	16.34	22.97	12.15	11.89	35.94
CTRG_00627	1449	93.08	394.21	456.29	151.58	123.73	313.27
CTRG_00628	453	17.98	23	15.18	16.42	8.59	11.49
CTRG_00629	813	50.26	83.54	53.92	50.8	39.21	43.51
CTRG_00630	1170	188.29	279.25	149.65	141.58	227.38	334.1
CTRG_00631	1941	1.25	2.54	4.15	3.68	2.96	4.4
CTRG_00632	2067	2.12	1.59	1.89	2.23	3.47	7.34
CTRG_00633	1791	0.12	0.26	0.77	0.59	2.07	9.89
CTRG_00634	1335	12.98	18.61	12.05	12.37	19.49	27.39
CTRG_00635	786	101.72	180.89	95.56	114.98	91.85	114.87
CTRG_00636	693	35.55	26.1	34.11	32.08	34.67	24.98
CTRG_00637	684	62.99	109.85	86.75	87.62	105.59	125.3
CTRG_00638	3807	0.34	0.36	1.31	1.02	0.95	2.23
CTRG_00639	726	17.51	19.7	18.68	24.15	9.83	16.05
CTRG_00640	1311	75.78	75.01	58.53	65.17	52.09	48.59
CTRG_00641	408	197.42	107.83	80.22	132.83	105.3	62.93
CTRG_00642	2376	14.4	38.94	85.59	13.31	31.19	108.86
CTRG_00643	1536	332.61	282.02	337.73	305.29	285.11	390.2
CTRG_00644	1527	16.79	17.66	16.82	17.12	15.8	17.4
CTRG_00645	1014	19.54	22.5	19.52	16.43	21.38	12.53
CTRG_00646	1083	37.41	53.64	48.8	66.21	44.92	44.1
CTRG_00647	1038	26.35	42.65	60.25	50.37	57.16	64.62
CTRG_00648	1380	71.56	52.82	50.73	79.99	48.25	48.86
CTRG_00649	1437	220.05	204.72	181.2	181.73	167.11	287.62
CTRG_00650	882	90.95	102.44	103.35	75.38	108.39	143.12
CTRG_00651	1953	36.58	51.22	70.43	51.67	92.39	164.71
CTRG_00652	2418	0	0.19	0.32	0.09	0.25	0.76
CTRG_00653	861	39.5	30	31.25	45.57	31.96	34.05
CTRG_00654	2253	6.78	13.55	17.04	15.36	15.48	32.15
CTRG_00655	2253	4.85	8.48	14.01	5.74	7.52	21.92
CTRG_00656	3927	9.83	11.57	24.29	16.23	25.94	44.58
CTRG_00657	1335	19.21	66.31	45.34	22.65	73.73	68.47
CTRG_00658	3120	14.11	13.71	26.65	19.76	39.24	66.88
CTRG_00659	1131	0.2	0	0	0.58	1.13	0.34
CTRG_00660	1290	22.56	19.88	37.36	28.16	60.02	72.54
CTRG_00661	2259	1.55	2.89	2.42	1.11	2.89	4.65
CTRG_00662	1389	5.81	46.73	7.94	3.08	3.77	8.88
CTRG_00663	1551	39.91	86.52	129.28	77.49	93.12	74.17
CTRG_00664	933	32.13	25.51	35.7	34.83	44.08	37.24
CTRG_00665	780	105.66	167.68	195.8	200.71	343.37	460.94
CTRG_00666	756	39.44	34.16	31.98	42.84	41.09	49.72
CTRG_00667	3321	14.14	21.83	36.79	24.42	23.4	28.64
CTRG_00668	1911	6.68	9.72	9.56	11.76	32.15	48.33
CTRG_00669	2631	6.93	7.39	10.52	5.59	6.24	14.4
CTRG_00670	768	604.6	513.48	384.16	662.18	719.33	704.12
CTRG_00671	1251	235.67	482.14	550.76	344.73	537.37	828.39
CTRG_00672	495	19.23	24.52	25.29	23.57	34.68	18.75
CTRG_00673	996	91.76	95.56	98.34	96.58	66.28	68.25
CTRG_00674	1560	11.84	16.95	14.79	15.78	19.18	22.2
CTRG_00675	318	9602.09	6228.67	6465.35	17071	5274.22	1480.96
CTRG_00676	411	3133.78	3167.6	4158.79	5546.65	2022.8	774.03
CTRG_00677	450	36.27	77.99	109.27	69.52	65.51	102.77
CTRG_00678	855	31.3	30.24	23.62	37.06	30.93	37.82
CTRG_00679	2133	14.26	23.45	28.03	22.83	22.43	23.74
CTRG_00680	1863	1.54	1.77	1.06	0.11	4.2	4.2
CTRG_00681	2196	0.2	0.32	1.42	0.38	1.67	14.37
CTRG_00682	336	3.43	4.8	6.21	11.23	31.55	40.95
CTRG_00683	1446	23.98	24.69	31.66	32.89	39.12	28.14
CTRG_00684	1263	29.16	28.6	20.79	36.64	69.74	86.04
CTRG_00685	1239	0.73	1.37	0.33	1.57	9.2	48.57
CTRG_00686	1029	7.15	4.09	7.8	8.09	26.25	22.38
CTRG_00687	1737	6.75	14.02	6.48	9.96	16.64	19.47
CTRG_00688	786	93.88	93.06	75.53	142.79	234.53	244.13
CTRG_00689	774	0.92	0.33	4.68	3.79	10.23	58.44
CTRG_00690	507	1.51	0	1.82	4.29	15.44	55.03
CTRG_00691	657	0	0	0	0	3.86	6.51
CTRG_00692	978	0	0	0	0.22	0.44	0.2
CTRG_00693	375	275.05	334.78	159.9	254.93	197.86	150.45
CTRG_00694	3753	24.66	26.98	57.58	40.73	47.17	73.17
CTRG_00695	1623	32.29	32.21	29.94	20.36	32.05	35.16
CTRG_00696	4515	12.79	12.59	25.11	10.95	17.09	21.85
CTRG_00697	885	22.72	18.24	18.94	20.34	28.53	28.74
CTRG_00698	1998	24.73	19.49	21.09	20.77	21.76	24.4
CTRG_00699	225	379.11	246.27	220.75	447.92	424.36	273.79
CTRG_00700	1269	0	0.38	0.32	0	1.66	1.36
CTRG_00701	1491	29.5	25.98	28.09	19.42	27.8	24.69
CTRG_00702	1158	11.2	17.1	17.93	14.6	22.72	29.81
CTRG_00703	447	73.74	104.68	61.22	87.34	85.7	75.2
CTRG_00704	933	13.95	35.44	29.23	21.09	34.57	40.41
CTRG_00705	531	11.45	13.05	17.62	10.83	19.03	42.97
CTRG_00706	450	12.28	4.51	7.92	4.97	9.2	5.54
CTRG_00707	2700	0.08	0.68	0.86	0.84	0.38	0.68
CTRG_00708	6624	11.86	14.14	51.39	10.95	14.4	17.78
CTRG_00709	2412	10.65	11.94	20.7	16.98	19.06	18.2
CTRG_00710	1674	21.45	26.2	29.33	21.85	23.73	35.03
CTRG_00711	1731	2.17	2.6	2.28	4.02	1.43	3.56
CTRG_00712	312	21.83	12.83	24.12	27.49	27.04	14.06
CTRG_00713	1521	22.72	32.17	22.79	24.32	30.64	34.96
CTRG_00714	1866	6.49	18.04	12.33	5.97	32.52	44.48
CTRG_00715	486	5.32	8.17	13.42	11.55	7.39	5.48
CTRG_00716	2661	14.19	18.95	29.46	8.88	14.78	7.98
CTRG_00717	351	6.46	13.53	8.05	0.76	5.21	14.71
CTRG_00718	429	0.62	6.86	0	3.51	16.09	13.93
CTRG_00719	663	1.47	3.99	0.66	0.35	5.11	6.89
CTRG_00720	780	79.47	118.59	64.45	91.39	59.21	67.66
CTRG_00721	1140	2.2	4.72	5.9	2.28	3.54	3.9
CTRG_00722	1743	2.54	3.66	2.49	2.06	3.08	7.5
CTRG_00723	459	6.85	6.28	6.69	9.69	20.6	38.31
CTRG_00724	525	69.66	79.97	40.95	72.73	70.43	63.49
CTRG_00725	384	0	0	0.65	0	0	1.86
CTRG_00726	972	552.49	830.51	932.75	875.54	1123.47	1640.64
CTRG_00727	888	17.9	27.26	25.23	20.77	46.56	72.25
CTRG_00728	3804	5.76	8.53	13.98	6.96	12.77	15.26
CTRG_00729	2187	8.7	9.82	7.32	9.45	19.05	22.45
CTRG_00730	3762	9.82	12.03	22.34	5.07	6.83	11.92
CTRG_00731	2430	0.09	0.19	0.24	0.34	0.25	1.13
CTRG_00732	363	0	3.44	0	6.52	0.71	0
CTRG_00733	1656	2.68	7.16	9.33	8.18	5.88	2.94
CTRG_00734	3438	9.39	23.4	35.66	27.04	21.06	25.32
CTRG_00735	603	97.98	221.98	61.56	76.51	51.77	110.09
CTRG_00736	2436	38.96	75.68	79.25	41.56	44.75	66.79
CTRG_00737	1338	21.49	27.08	42.44	28.66	34.04	23.76
CTRG_00738	1092	20.85	35.15	15.44	25.68	2.91	0
CTRG_00739	453	15.66	17.89	38.74	18.61	75.17	122.38
CTRG_00741	1689	18.64	30.25	178.24	41.62	16.13	13.41
CTRG_00742	966	11.5	26.08	16.31	16.19	17.42	9.16
CTRG_00743	882	6.89	8.58	4.99	5.04	7.9	10.59
CTRG_00744	1353	11.96	16.38	24.2	24.54	27.27	27.13
CTRG_00745	1704	49.9	80.6	115.23	85.03	118.27	178.66
CTRG_00746	1848	73	97.4	77.64	68.98	87.88	136.33
CTRG_00747	1404	146.72	208.73	362.71	301.03	797.09	602.38
CTRG_00748	1818	6.31	8.3	3.58	2.43	4.53	4.1
CTRG_00749	2046	1.39	1.83	0.48	0.92	3.9	9.05
CTRG_00750	1509	20.84	26.43	68.41	16.21	33.94	39.51
CTRG_00751	1098	35.4	44.99	42.67	30.93	46.58	47.49
CTRG_00752	1689	6.8	9.59	49.83	7.93	23.79	39.47
CTRG_00753	1095	173.34	176.48	179.03	250.14	349.64	284.41
CTRG_00754	2604	24.8	42.85	83.58	46.44	145.16	211.96
CTRG_00755	1338	38.53	26.81	22.78	18.29	50.49	44.97
CTRG_00756	768	4.03	4.7	11.12	10.01	14.42	13.72
CTRG_00757	339	129.49	122.24	88.98	99.12	106	61.77
CTRG_00758	1680	29.41	32.17	53.13	41.52	57.5	60.09
CTRG_00759	876	31.26	28.84	18.68	22.1	29.11	16.58
CTRG_00760	2925	16.71	35.22	56.77	21.26	45.33	56.22
CTRG_00761	1476	3.03	2.76	8.38	3.03	7.77	8.96
CTRG_00762	1107	17.95	19.52	32.87	29.87	27.51	32.37
CTRG_00763	864	40.97	55.07	57.39	52.11	50.27	30.45
CTRG_00764	744	44.98	81.43	90.81	102.5	85.17	60.78
CTRG_00765	1734	31.38	54.7	50.35	33.47	50.85	58.75
CTRG_00766	1062	22.03	19.05	32.08	12.75	23.35	12.46
CTRG_00767	1083	17.12	22.96	14	17.31	19.9	32.09
CTRG_00768	660	14.38	18.83	17.89	12.24	10.63	14.17
CTRG_00769	711	14.55	25.32	26.43	17.99	16.99	25.11
CTRG_00770	1560	0	0.15	0.25	0	0.13	0.36
CTRG_00771	1074	2.56	7.57	3.44	2.03	15.51	36
CTRG_00773	1527	3.21	2.66	3.91	1.25	1.91	1.48
CTRG_00774	1032	16.94	24.46	8.18	9.97	13.08	14.75
CTRG_00775	597	17.01	23.51	5.6	10.22	20.8	25.55
CTRG_00776	2220	10.24	19.75	19.76	17.01	25.65	48.26
CTRG_00777	1692	18.46	24.5	27.24	16.11	21.75	26.77
CTRG_00778	2040	16.67	29.05	32.92	25.04	30.03	54.74
CTRG_00779	1335	7.41	9.22	14.61	11.08	25.15	39.8
CTRG_00780	681	54.42	55.21	32.9	57.36	65.79	45.22
CTRG_00781	2337	9.33	11.15	19.9	16.3	14.82	17.48
CTRG_00782	1158	44.8	47.07	46.05	48.28	41.41	47.13
CTRG_00783	1737	288.15	259.93	364.44	250	302.31	346.24
CTRG_00784	939	22.01	32.25	29.9	25.41	22.81	33.61
CTRG_00785	2730	21.2	23.19	33.5	20.7	34.72	57.38
CTRG_00786	813	19.76	17.9	16.15	36.72	36.51	46.23
CTRG_00787	435	7.33	18.19	10.47	14.39	22.59	13.16
CTRG_00788	969	27.95	62.52	62.03	54.99	106.81	99.98
CTRG_00789	1527	23.94	32.04	34.82	26.72	52.31	49.75
CTRG_00790	3222	18.47	25.45	48.39	11.83	18.39	19.06
CTRG_00791	579	42.59	78.84	62.68	58.65	86.24	86.53
CTRG_00792	1182	107.04	118.46	90.58	100.12	117.55	88.26
CTRG_00793	1125	458.89	369.81	402.93	367.07	416.46	461.21
CTRG_00794	1704	25.6	29.32	51.76	31.36	40.52	51.28
CTRG_00795	825	13.15	10.5	24.85	11.95	15.96	34.77
CTRG_00796	450	56936.9	40989.4	23438.4	54331.5	34207.1	18176.7
CTRG_00797	771	91.63	139.89	152.2	151.19	90.99	115.34
CTRG_00798	498	33.02	67.92	38.12	20.47	45.42	78.43
CTRG_00799	1017	153.31	135.77	101.77	138.58	153.2	142.97
CTRG_00800	1014	69.29	109.07	124.88	108.75	143.11	81.75
CTRG_00801	2130	12.64	18.21	32.38	18.64	31.49	38.87
CTRG_00802	2541	20.18	29.55	43.03	28.51	43.55	67.81
CTRG_00803	852	4.96	9.82	6.18	6.03	10.78	10.31
CTRG_00804	582	109.02	201.44	135.36	119.43	151.6	92.57
CTRG_00805	1068	1.93	4.85	14.6	7.36	9.2	12.2
CTRG_00806	4524	6.95	8.4	17.52	8.94	15.64	29.17
CTRG_00807	342	4.18	5.61	15.16	3.13	7.7	7.99
CTRG_00808	402	0	0.75	0	0	0	0
CTRG_00809	2070	13.34	10.29	17.3	7.99	33.92	34.33
CTRG_00810	2811	0.15	0	1.79	0.96	0.58	0.65
CTRG_00811	2700	4.02	4.79	3.65	2.38	4.88	7.72
CTRG_00812	1755	32.24	32.32	34.98	32.81	43.51	36.18
CTRG_00813	360	0	1.74	2.83	0	0	0.68
CTRG_00814	354	0	0	0	0	0.74	0
CTRG_00815	396	0	0	0	0	0.64	0
CTRG_00816	2484	36.16	50.43	51.25	35.96	52.77	84.06
CTRG_00817	597	718.91	790.24	781.84	865.24	1277.2	1663.18
CTRG_00818	2004	19.94	18.72	38.33	17.67	26.81	49.39
CTRG_00819	1683	181.29	244.47	227.17	209.23	145.15	167.57
CTRG_00820	360	0	0	4.24	0	0.72	0
CTRG_00821	948	28.14	39.03	20.16	22.11	32.6	28.68
CTRG_00822	972	32.37	45.64	40.07	34.2	47.01	45.88
CTRG_00823	1431	42.08	56.31	45.85	36.24	34.16	43.81
CTRG_00824	579	1.72	0	0	0	0	0
CTRG_00825	1878	14.07	16.04	12.56	15.33	24.42	24.47
CTRG_00826	726	32.05	46.19	38.55	48.3	47.94	29.85
CTRG_00827	1602	27.74	60.42	54.52	58.61	54.51	34.01
CTRG_00828	384	63.07	74.05	66.77	72.09	80.06	60.15
CTRG_00829	786	31.09	30.04	24.91	36.7	28.09	33.41
CTRG_00830	2133	12.52	8.33	8.88	10.29	8.82	4.68
CTRG_00831	999	9.01	7.71	21.09	6.37	17	17.64
CTRG_00832	2469	2.03	4.51	3.54	3.53	5.76	7.88
CTRG_00833	1035	38.43	49.24	42.75	35.1	49.68	68.6
CTRG_00834	1614	38.95	51.69	26.43	12.47	24.92	81.79
CTRG_00835	792	12.87	11.98	5.64	10.52	9.47	4.84
CTRG_00836	567	177.29	232.54	209.91	197.46	324.56	355
CTRG_00837	1614	34.13	44.03	50.65	39.9	32.12	42.93
CTRG_00838	732	2.62	4.97	2.94	2.8	3.04	1.95
CTRG_00839	1782	1.74	3.45	4.43	1.66	3.36	9.74
CTRG_00840	1647	4.18	8.93	5.41	6.68	4.4	9.56
CTRG_00841	936	8.19	16.32	18.45	10.15	14.8	19.39
CTRG_00842	1179	2.51	2.28	0.34	0.18	1.26	2.29
CTRG_00843	2928	17.28	34.85	72.37	24.83	22.71	65.43
CTRG_00844	1557	7.86	16.68	9.32	8.32	9.07	13.9
CTRG_00845	2415	15.15	25.87	38.94	21.52	20.3	38.11
CTRG_00846	3291	91.99	122.59	165.05	91.65	109.55	194.95
CTRG_00847	2760	6.52	6.44	14.57	8.62	11	22.71
CTRG_00848	696	13.53	25.59	44.22	56.27	50.63	31.06
CTRG_00849	3117	4.22	6.05	7.16	6.95	8.87	12.49
CTRG_00850	717	189.38	179.5	157.34	200.42	631.48	553.23
CTRG_00851	420	172.99	309.81	154.53	205.03	224.85	228.03
CTRG_00852	636	308.85	508.07	341.54	368.32	444.69	509.3
CTRG_00853	1782	167.94	185.51	181.61	152.55	182.49	193.83
CTRG_00854	2802	12.37	13.1	20.61	14.84	24.7	33.89
CTRG_00855	954	13.12	17.54	18.28	18.96	18.11	10.11
CTRG_00856	2412	0.45	0.1	0.4	0.26	0.67	1.14
CTRG_00857	2574	33.08	47.06	52.77	31.19	49.76	66.84
CTRG_00858	996	0	0	0	0	0	0.2
CTRG_00859	1056	27.16	54.23	30.14	29.79	44.55	72.44
CTRG_00860	1107	8.47	3.24	5.16	26.15	19.21	7.31
CTRG_00861	453	20.3	7.67	6.8	18.61	28.46	8.49
CTRG_00862	645	0	0	0	0	2.82	1.62
CTRG_00863	825	0	0	0	0	1.86	3.89
CTRG_00864	1029	0.56	2.26	1.92	1.57	7.3	7.96
CTRG_00865	1059	0	0	0	0	21.6	25.36
CTRG_00866	675	0	0	0	0	3.34	8.59
CTRG_00867	963	0	0	0	0	0.22	0.82
CTRG_00868	963	1.77	0	1.41	7.32	11.78	1.94
CTRG_00869	597	6.22	0	1.87	7.07	13.48	6.74
CTRG_00870	1866	1.06	2.15	2.11	0.23	4.63	8.28
CTRG_00871	1152	104.54	152.64	113.49	132.87	119.76	81.23
CTRG_00872	1404	7.02	4.79	8.7	11.11	13.85	12.56
CTRG_00873	939	1.6	3.36	4.08	2.96	4.6	5.68
CTRG_00874	1866	10.93	2.32	1.31	2.93	4.59	2.87
CTRG_00875	3189	3.52	3.75	4.4	4.33	4.61	5.93
CTRG_00876	444	1.19	1.31	0.54	0	2.2	1.54
CTRG_00877	435	1.83	0.67	1.1	2.88	3.95	4.21
CTRG_00878	681	662.62	827.03	435.96	552.31	533.61	465.25
CTRG_00879	855	34.59	20.16	31	46.19	151.32	126.77
CTRG_00880	2406	9.5	13.62	10.9	7.35	8.88	10.16
CTRG_00881	1698	36.91	106.16	165.75	75.15	54.18	93.69
CTRG_00882	1101	23.87	112.93	131.52	131.64	60.57	103.15
CTRG_00883	2550	32.89	33.53	43.79	38.33	31.85	48.44
CTRG_00884	2154	16.96	20.82	30.73	18.91	36.34	67.91
CTRG_00885	1458	9.35	22.17	29.32	21.05	17.03	17.51
CTRG_00886	2382	68.96	31.23	46.19	66.38	91.52	43.06
CTRG_00887	393	0	2.31	11.95	6.54	0	1.2
CTRG_00888	2766	0.7	0.83	1.82	2.09	2.85	5.42
CTRG_00889	1701	21.74	24.78	42.55	29.18	37.31	38.84
CTRG_00890	1398	0.89	7.02	20.15	2.29	20.26	40.34
CTRG_00891	1095	70.17	110.92	105.02	73.77	80.01	56.14
CTRG_00892	2631	9.24	13.11	21.49	8.98	19.66	24.49
CTRG_00893	360	47.61	53.1	24.74	37.36	38.14	19.63
CTRG_00894	2661	18.51	25.03	37.96	14.8	20.57	17.26
CTRG_00895	876	10.42	7.5	13.65	11.43	16.67	9.09
CTRG_00896	1002	37.75	85.25	96.24	118.72	103.38	134.02
CTRG_00897	741	91.99	152.79	220.12	90.71	117.09	229.39
CTRG_00898	1392	2.42	3.63	1.15	1.69	3.01	5.73
CTRG_00899	2085	17.24	25.81	21.67	17.46	24.34	26.97
CTRG_00900	4602	0.98	1.53	2.86	1.69	2.26	4.89
CTRG_00901	1299	101.18	121.36	47.32	72.1	84.34	101.53
CTRG_00902	1404	0.71	1.4	1.35	0.61	20.5	41.17
CTRG_00903	2832	13.3	18.25	45.41	19.57	20.5	57.75
CTRG_00904	2937	28.93	30.2	48.59	25.81	54.49	83.98
CTRG_00905	852	28.11	40.78	27.42	49.52	33.62	23.44
CTRG_00906	2706	11.14	18.45	31.09	13.85	26.51	45.07
CTRG_00907	396	48.2	51.93	20.54	31.74	34.98	27.38
CTRG_00908	921	12.13	29.97	12.9	6.49	25.18	39.93
CTRG_00909	1236	14.1	38.12	50.43	39.07	25.44	80.65
CTRG_00910	2919	4.22	4.58	4.89	2.34	11.42	18.55
CTRG_00911	1137	15.43	16.37	7.53	22.33	16.45	5.78
CTRG_00912	2493	11.25	10.7	15.72	8.25	28.04	43.56
CTRG_00913	834	0.85	0.61	0	0.27	8.67	4.8
CTRG_00914	714	638.91	737.63	817.72	966.92	2931.7	4145.41
CTRG_00915	753	22.82	27.11	13.36	22.87	96.7	93.95
CTRG_00916	1032	1.11	3.12	3.79	5.3	18.9	24.77
CTRG_00917	2208	26.92	31.49	38.51	25.42	30.14	28.74
CTRG_00918	2748	0	0.25	0.63	0	0.29	0.27
CTRG_00919	1623	7.66	9.22	9.04	5.87	8.3	8.44
CTRG_00920	3186	18.68	21.2	30.85	22.64	33.28	64.47
CTRG_00921	387	122.03	192.23	95.6	158.08	134.93	70.57
CTRG_00922	408	0.66	0	0	0	0	0
CTRG_00923	1395	84.07	249.98	387.64	158.45	254.53	224.72
CTRG_00924	2601	19.78	35.43	25.02	15.95	25.9	38.09
CTRG_00925	867	41.63	73.24	54.02	54.47	43.54	30.56
CTRG_00926	846	100.57	104.72	70.47	92.69	69.06	88.37
CTRG_00927	657	205.78	379.14	208.83	206.03	225.68	204.83
CTRG_00928	2304	25.47	47.39	58.55	60.85	63.96	81.98
CTRG_00929	1137	131.29	90.68	97.55	145.46	175.67	189.45
CTRG_00930	2961	3.5	6.3	9.05	2.65	7.91	7.51
CTRG_00931	1557	61.05	77.29	70.51	67.08	55.65	65.04
CTRG_00932	1788	28.03	42.25	39.37	46.19	49.01	54.05
CTRG_00933	627	125.3	147.42	60.18	62.35	91.66	60.57
CTRG_00934	648	5.28	3.28	10.83	6.43	5.95	9.98
CTRG_00935	1206	25.95	24.23	19.68	27.58	33.49	26.28
CTRG_00936	2310	7.93	7.86	14.75	9.56	11.2	18.49
CTRG_00937	1602	113.33	205.45	288.47	159.56	190.2	345.25
CTRG_00938	2292	21.33	27.02	67.2	42.72	67.24	97.29
CTRG_00939	1680	16.49	43.46	38.05	26.05	33.74	47.16
CTRG_00940	1023	1.57	20.83	90.43	11.78	65.21	273.01
CTRG_00941	8865	0.1	0.25	2.23	1.69	1.85	5.64
CTRG_00942	615	12.42	22.68	13.32	10.25	18.23	16.78
CTRG_00943	1980	16.09	17.3	31.59	20.65	28.18	29.7
CTRG_00944	1167	30.2	51.28	49.85	46.21	36.52	41.12
CTRG_00945	1134	62.12	96.34	137.58	117.16	167.36	211.47
CTRG_00946	729	178.9	280.11	221.34	199.79	272.51	203.5
CTRG_00947	2943	17.48	23.33	41.02	11.37	16	20.44
CTRG_00948	951	133.15	266.72	190.88	127.35	190.14	183.28
CTRG_00949	480	26.45	21.94	29.2	33.64	28.5	27.84
CTRG_00950	882	130.2	191.71	150.87	136.39	256.79	282.41
CTRG_00951	3063	23.62	36.5	85.88	56.58	90.47	112.14
CTRG_00952	1647	4.31	10.23	19.37	17.22	8.3	7.4
CTRG_00953	3441	2.19	4.79	12.32	2.39	11.87	17.87
CTRG_00954	519	0	2.19	8.14	5.79	5.37	10.07
CTRG_00955	579	1.73	0	227.51	241.64	164.64	160.75
CTRG_00956	1437	145.14	260.68	0.01	0.26	107.8	110.84
CTRG_00957	756	1300.15	1471.52	1021.47	1395.15	1622.11	1743.09
CTRG_00958	2967	26.74	36.1	58.28	36.33	42.49	71.98
CTRG_00959	1437	0	0.27	356.97	252.14	220.91	244.9
CTRG_00960	579	152.7	239.79	0	0.7	144.41	192.72
CTRG_00961	2004	12.38	18.36	19.61	9.36	20.79	39.5
CTRG_00962	2415	3.97	7.31	7.24	4.48	8.09	16.28
CTRG_00963	3015	12.32	18.71	40.45	16.5	21.56	42.47
CTRG_00964	5175	13.23	12.05	31.73	19.86	33.1	76.42
CTRG_00965	786	19.92	32.33	11.91	19.78	12.92	18.76
CTRG_00966	507	97.92	78.02	48.2	83.96	85.61	60.23
CTRG_00967	1446	37.9	40.6	52.39	53.83	138.72	201.15
CTRG_00968	1578	0	0	0.38	0	0.66	0
CTRG_00969	2574	3.04	1.98	4.74	2.66	7.73	11.96
CTRG_00970	396	68.85	108.43	63.5	77.73	99.21	60.71
CTRG_00971	1668	136.63	132.93	136.51	128.55	174.19	194.11
CTRG_00972	726	66.09	48.7	45.37	53.32	74.98	56.33
CTRG_00973	4407	4.51	4.91	10.25	5.38	12.03	21.09
CTRG_00974	1041	43.93	45.12	53.94	35.72	34.15	32.58
CTRG_00975	2490	12.93	14.63	23.85	6.42	10.69	6.93
CTRG_00976	1569	0.14	0.3	0.76	0	0.4	0.84
CTRG_00977	6471	8.24	9.6	17.73	8.76	11.88	30.2
CTRG_00978	969	6.45	10.29	22.46	15.45	10.24	6.49
CTRG_00979	1272	39.41	50.66	81.74	38.4	39.74	52.76
CTRG_00980	450	0	0	0.53	0	0	0
CTRG_00981	1902	18.52	27.95	24.18	18	19.88	25.51
CTRG_00982	360	38.24	47.01	23.32	21.98	23.75	45.34
CTRG_00983	2766	4.93	6.18	14.39	7.33	9.95	18.89
CTRG_00984	2145	15	18.08	23.86	15.1	22.2	19.63
CTRG_00985	2307	20.61	26.13	53.67	31.6	55.57	97.51
CTRG_00986	501	131.11	102.79	56.76	74.04	73.57	54.54
CTRG_00987	3732	7.54	9.07	19.13	12.1	21.79	25.84
CTRG_00988	372	51.56	90.66	54.1	56.85	53.09	65.37
CTRG_00989	1062	9.5	11.85	10.82	8.84	6.84	10.81
CTRG_00990	1605	20.49	33.19	45.26	31.43	38.64	38.15
CTRG_00991	927	8.03	8.93	7.64	3.82	7.71	7.89
CTRG_00992	807	0	0.32	0.53	0	0.82	1
CTRG_00993	1641	116.02	142.22	90.95	108.34	167.5	160.37
CTRG_00994	1062	22.67	40.65	23.58	24.46	22.34	29.31
CTRG_00995	504	9947.74	7972.72	4594.18	8454.45	7051.62	3949.87
CTRG_00996	4923	0.95	4.2	3.63	1.45	4.62	12.45
CTRG_00997	978	8.75	13.5	8.68	10.8	10.35	6.82
CTRG_00998	705	12.64	15.2	11.96	13.62	12.39	11.95
CTRG_00999	420	29.36	50.11	41.52	50.5	30.1	13.77
CTRG_01000	2766	19.9	38.41	43.04	34.72	33.09	26.42
CTRG_01001	1998	404.41	400.74	398.86	576.35	357.57	347.41
CTRG_01002	708	61.45	57.19	40.33	73.07	80.2	60.73
CTRG_01003	1320	5.29	2.74	7.62	6.5	9.07	13.14
CTRG_01004	1404	12.29	10.09	13.56	11.11	14	10.4
CTRG_01005	1251	2.17	18.04	34.26	8.09	21.41	35.36
CTRG_01006	1686	5.26	5.48	3.64	10.78	10.06	12.77
CTRG_01007	6825	92.61	224.55	686.55	140.71	118.33	504.4
CTRG_01008	2280	4.79	8.27	11.62	11.79	14.04	24.32
CTRG_01009	1221	0	0.2	1.49	0.35	0	0.47
CTRG_01010	1185	0.19	0.62	0.17	0.18	0.18	0.97
CTRG_01011	1221	32.47	30.27	15.1	12.9	11.94	11.94
CTRG_01012	1413	32.98	71.7	44.5	42.63	27.81	15.56
CTRG_01013	1599	69.22	73.63	50.41	64.03	74.73	81.9
CTRG_01014	1416	3.16	6.27	10.46	12.82	7.38	10.31
CTRG_01015	720	29.46	30.35	5.66	15.06	32.69	28.6
CTRG_01016	1443	53.8	95.67	86.73	67.99	80.15	98.9
CTRG_01017	624	740.31	744.39	756.32	959.1	797.01	784.49
CTRG_01018	3645	3.89	5.59	12.3	4.39	7.72	15.55
CTRG_01019	2112	3.63	2.99	2.96	1.19	7.84	11.38
CTRG_01020	2655	31.63	30.23	48.92	42.77	36.73	63.82
CTRG_01021	1014	36.12	57.22	55.52	56.43	160.47	160.99
CTRG_01022	573	0	0	0	0.82	0	2.61
CTRG_01023	3240	37.79	46.56	72.03	40.05	55.41	99.48
CTRG_01024	672	81.63	161.21	74.61	69.2	83.59	69.67
CTRG_01025	840	154.87	359.68	235.72	181.53	195.27	189.85
CTRG_01026	552	30.97	71.66	47.54	51.28	19.44	13.66
CTRG_01027	4221	18.01	18.84	31.38	15.56	20.01	31.79
CTRG_01028	2217	5.22	5.37	61.89	23.34	3.16	2.16
CTRG_01029	729	10.52	27.08	201.87	178.25	11.32	5.89
CTRG_01030	4071	4	5.21	5.77	5.18	9.2	10.95
CTRG_01031	267	38.02	39.33	20.56	49.68	65.27	43.78
CTRG_01032	1128	34.17	31.72	26.77	26.57	30.91	31.88
CTRG_01033	1911	26.94	31.62	53.05	33.3	34.52	51.64
CTRG_01034	1299	0.52	0.56	0.78	1.16	4.86	3.53
CTRG_01035	5070	7.03	9.4	15.6	4.99	11.25	12.58
CTRG_01036	1509	15.08	19.47	26.28	24.67	33.66	35.13
CTRG_01037	633	19.01	39.03	15.25	19.2	12.46	12.43
CTRG_01038	1593	0.7	1.64	46.14	35.1	11.05	20.21
CTRG_01039	1959	6.16	15.86	36.47	26.52	22.77	36.42
CTRG_01040	1014	0	0.24	2.44	0.22	1.27	1.54
CTRG_01041	3714	0.06	0.49	2.11	0.68	1.74	3.59
CTRG_01042	2175	0.1	0.11	1.71	0.19	1.22	3.48
CTRG_01043	2199	2.19	2.12	2.66	1.71	11.61	16.95
CTRG_01044	1260	98.99	91.79	110.33	107.99	97.01	87.33
CTRG_01045	2337	66.8	77.95	84.08	111.18	76.18	55.18
CTRG_01046	2400	16.52	19.07	20.57	18.11	22.89	36.22
CTRG_01047	1245	246.35	284.26	261.39	292.69	252.97	287.74
CTRG_01048	465	0	0	0	0	0.52	0.97
CTRG_01049	1176	0	0	0.35	0.18	0.36	4.09
CTRG_01050	930	2	7.28	27.54	5.47	40.75	57.54
CTRG_01051	1431	5.01	1.84	2.38	4.47	7.88	7.15
CTRG_01052	1635	24.71	20.19	20.13	19.42	21.92	31.1
CTRG_01053	339	0.85	1.9	0	0	0.78	2.21
CTRG_01054	4089	16.51	16.78	42.51	23.54	30.13	52.48
CTRG_01055	240	441.61	475.57	336.77	523.37	585.49	402.91
CTRG_01056	309	204.91	200.62	93.45	240.86	193.61	121.62
CTRG_01057	2454	19.33	28.94	38.53	28.2	35.46	41.82
CTRG_01058	402	2.03	4.49	8.55	5.72	15.6	12.25
CTRG_01059	2205	4.56	7.94	19.37	6.15	16.85	30.54
CTRG_01060	1623	0	0	0	0	0	0.12
CTRG_01061	1569	0.71	1.06	0	0.27	3.31	2.16
CTRG_01062	1665	8.66	34.05	7.61	4.95	13.18	120.88
CTRG_01063	2649	11.8	19.91	17.98	13.46	21.74	25.77
CTRG_01064	2070	25.84	20.24	25.61	22.64	25.91	40.5
CTRG_01065	1374	71.73	70.75	89.08	34.42	33.54	17.28
CTRG_01066	1746	0.38	2.17	1.13	0.72	2.01	1.28
CTRG_01067	462	112.08	130.82	36.76	88.13	90.66	67.71
CTRG_01068	1227	21.78	23.38	21.29	26.2	55.76	63.16
CTRG_01069	2235	6.35	6.47	6.89	7.09	9.5	9.24
CTRG_01070	1173	49.02	39.75	18.03	24.55	124.85	128.57
CTRG_01071	1551	90.3	81.15	46.94	125.55	270.13	234.66
CTRG_01072	2184	21.33	22.87	32.7	34.7	53.59	59.91
CTRG_01073	408	0	0	0	0.62	0	0
CTRG_01074	2082	38.94	48.44	70.65	48.63	60.95	76.68
CTRG_01075	1347	26.2	25.05	45.06	32.93	39.08	55.8
CTRG_01076	1368	10.18	20.76	29.35	25.03	28.79	22.09
CTRG_01077	564	49.71	43.13	47.12	71	130.97	84.38
CTRG_01078	1125	203.79	247.34	241.11	184.79	205.68	236.54
CTRG_01079	1470	48.79	47.21	52.43	33.91	90.92	107.24
CTRG_01080	2628	21.56	18.85	32.57	19.25	31.26	39.29
CTRG_01081	591	171.71	178.03	99.67	136.38	177.34	143.68
CTRG_01082	852	186.88	166.08	181.33	189.42	178.08	160.09
CTRG_01083	633	49.18	56.45	50.46	54.69	126.98	102.57
CTRG_01084	585	46.74	43.56	38.6	38.63	31.16	24
CTRG_01085	675	7.91	16.78	23.88	13.63	10.69	11.35
CTRG_01086	1029	184.21	179.23	162.29	125.11	298.96	405.55
CTRG_01087	909	1.28	1.66	5.74	2.19	2.63	4.36
CTRG_01088	1497	32.35	21.39	32.64	24.45	34.5	40.85
CTRG_01089	1176	82.13	83.01	96.62	87.79	111.35	168.49
CTRG_01090	237	11139.3	10417.5	7839.58	10417.1	8387.59	4755.43
CTRG_01091	801	51.12	37.38	31	41.54	31.62	28.67
CTRG_01092	1563	58.52	58.53	81.41	65.32	87.58	103.42
CTRG_01093	912	1.53	1.1	4.81	2.19	30.93	27.35
CTRG_01094	1302	108.71	131.27	134.03	104.59	114.17	121.21
CTRG_01095	732	37.97	79.8	61.1	55.31	64.84	48.26
CTRG_01096	1212	6.73	9.24	9.2	3.56	18.31	22.02
CTRG_01097	1422	36.85	58.39	90.78	66.06	63.78	42.64
CTRG_01098	2298	17.28	36.27	53.63	24.11	32.29	39.82
CTRG_01099	597	42.31	44.76	35.06	39.69	78.19	45.07
CTRG_01100	1155	86.9	97.59	88.31	131.37	340.81	451.09
CTRG_01101	660	23.6	19.23	14.25	17.84	18.17	19.52
CTRG_01102	1560	0.29	0.46	0	0.14	3.2	5.67
CTRG_01103	1686	41.66	64.37	79.1	68.44	61.34	58.08
CTRG_01104	1791	6.66	9.88	18.38	4.23	9.55	11.67
CTRG_01105	1428	14.89	18.81	22.98	13.3	15.8	11.28
CTRG_01106	2100	107.54	153.03	175.12	106.44	166.9	270.15
CTRG_01107	2874	13.63	12.84	18.94	12.8	19.56	23.55
CTRG_01108	1863	77.59	86.08	143.4	69.3	79.07	45.85
CTRG_01109	1188	113.53	154.54	123.25	80.65	122.43	201.94
CTRG_01110	726	132.5	148.25	147.97	139.88	197.28	158.28
CTRG_01111	405	0	0	0	0	2.47	1.73
CTRG_01112	1296	0	0	0	0	1.46	5.01
CTRG_01113	1812	12.42	14.58	21.75	10.92	22.4	20.27
CTRG_01114	1062	12.09	22.07	20.1	8.02	13.08	2.56
CTRG_01115	813	74.38	71.6	111.49	68.74	92.48	49.2
CTRG_01116	633	18.59	23.17	29.58	38.91	35.25	42.35
CTRG_01117	3741	10.56	20.29	48.61	24.08	25.76	25.48
CTRG_01118	3801	13.61	16.11	28.09	16.35	18.69	26.93
CTRG_01119	351	107.39	211.06	63.63	88.6	179.33	286.59
CTRG_01120	2034	22.65	19.81	29.84	21.62	26.09	29.41
CTRG_01121	1716	1.93	1.52	0.35	0	2.53	3.81
CTRG_01122	1359	174.42	216.93	152.95	165.77	508.36	668.28
CTRG_01123	1002	22.33	34.45	43.07	33.51	149.07	186.19
CTRG_01124	2385	2.74	3.51	3.1	2.97	8.53	7.71
CTRG_01125	1695	0.13	0.7	0.58	0.62	0.61	1.66
CTRG_01126	1560	30.25	33.14	38.88	36.74	30.1	30.28
CTRG_01127	1527	117.79	110.96	112.02	91.17	86.91	92.46
CTRG_01128	1569	20.85	27.02	31.29	19.07	39.18	53.84
CTRG_01129	714	35.36	66.09	51.09	64.25	89.26	85.57
CTRG_01130	969	21.97	27.53	32.51	25	21.81	18.66
CTRG_01131	1029	2.68	12.75	8.4	7.66	35	60.32
CTRG_01132	681	15.29	7.34	19.16	70.52	38.35	37.94
CTRG_01133	930	1.25	4.31	3.58	4.28	3.49	1.27
CTRG_01134	2772	41.81	66.14	88.6	57.56	116.05	151.11
CTRG_01135	1251	108.26	115.4	105.85	90.06	106.19	127.04
CTRG_01136	1530	10.34	13.26	17.7	14.72	17.94	27.59
CTRG_01137	2745	11.92	13.89	25.7	13.27	20.95	31.02
CTRG_01138	1602	13.32	18.41	26.52	12.97	25.64	28.85
CTRG_01139	837	0	0	0	0	0.26	0.24
CTRG_01140	294	2.06	2.34	15.95	59.69	724.89	211.05
CTRG_01141	630	7.79	13.56	17.85	25.83	122.62	120.12
CTRG_01142	1182	0.19	0	1.55	0.37	6.27	5.37
CTRG_01143	1812	7.06	14.84	17.72	9.64	24.11	25.72
CTRG_01144	1041	27.59	34.91	47.81	32.77	47.11	69.47
CTRG_01145	1290	0	0	0	0.17	0.33	0.44
CTRG_01146	897	10.15	12.35	12.82	12.12	17.93	12.61
CTRG_01147	1467	5.94	9.3	11.57	13.65	13.79	13.66
CTRG_01148	1875	25.96	26.49	33.25	20.07	27.86	35.42
CTRG_01149	1749	18.46	24.06	16.93	14.95	25.02	32.68
CTRG_01150	1329	43.18	60.1	53.44	44.54	59.24	77.26
CTRG_01151	1194	0.76	7.35	1.87	1.27	3.01	13.85
CTRG_01152	1179	17.34	18.01	11.72	9.73	17.97	18.13
CTRG_01153	450	107.05	127.62	65.46	110.9	94.74	71.03
CTRG_01154	1221	40.82	75.28	56.91	45.25	65.92	108.13
CTRG_01155	978	1.18	1.02	0.85	0	0	0
CTRG_01156	684	0	0.77	0	0	0	0
CTRG_01158	678	2.86	6.21	1.28	2.37	3.32	8.24
CTRG_01159	624	57.49	68.57	35.75	45.53	53.4	90.19
CTRG_01160	477	59.84	95.66	52	90.4	768.9	587.05
CTRG_01161	1089	74.38	75.9	62.42	46.21	63.06	53.09
CTRG_01162	558	258.94	224.4	131.07	162.94	191.45	164.05
CTRG_01163	2226	31.41	40.65	60.26	47.42	54.74	96.25
CTRG_01164	1644	2427.14	3331.74	5774.69	4263.49	2989.71	3720.13
CTRG_01165	1644	0	0.14	0.72	1.16	0.5	1.25
CTRG_01166	642	253.68	438.61	301.85	270.46	325.93	254.76
CTRG_01167	456	6.9	2.53	6.75	7.06	9.05	3.96
CTRG_01168	1179	93.65	111.55	95.32	80.39	117.87	94.71
CTRG_01169	513	0	5.45	0.45	1.41	8.76	2.56
CTRG_01170	1386	0.49	0.35	1.88	0.93	0.15	0.82
CTRG_01171	657	17.06	13.3	20.32	33.05	15.51	17.73
CTRG_01172	1026	72.44	116.82	121.66	97.55	98.65	102.57
CTRG_01173	849	3.87	9.26	5.46	2.63	10.3	21.42
CTRG_01174	2424	44.19	54.32	64.11	53	88.7	85.85
CTRG_01175	747	33443.1	24626	18225.8	27382	15587.1	10600.4
CTRG_01176	699	53.15	62.9	42.76	51.74	58.4	63.58
CTRG_01177	1320	56.63	59.63	80.82	54.46	137.64	184.83
CTRG_01178	4146	16.48	22.48	37.72	20.94	28.16	64.27
CTRG_01179	867	167.59	135.09	177.07	157.77	128.1	89.16
CTRG_01180	7512	2.15	3.09	13.55	7.29	8.48	19.55
CTRG_01181	1188	99.77	96.25	102.05	89.93	91.25	130.85
CTRG_01182	1968	12.17	17.18	15.55	13.21	19.39	25.36
CTRG_01183	1872	0	0.13	0.11	0.22	0.55	0.5
CTRG_01184	2538	14.81	21.55	31.09	23.06	24.56	32.79
CTRG_01185	1731	111.57	29.11	3.77	14.02	105.95	83.91
CTRG_01186	4395	30.03	32.05	74.45	41.78	97.94	184.22
CTRG_01187	2436	19.3	24.69	25.43	30.55	34.9	27.52
CTRG_01188	1779	10.55	11.28	10.42	6.28	15.3	18.57
CTRG_01189	3012	33.35	39.13	61.86	44.61	57.99	80.97
CTRG_01190	2508	4.16	7.77	10.98	6.95	10.13	18.94
CTRG_01191	894	30.56	26.21	25.98	42.47	80.75	59.93
CTRG_01192	894	57.99	45.08	81.2	61.59	175.61	144.06
CTRG_01193	1185	10.16	20.17	17.83	16.25	21.98	26.47
CTRG_01194	1128	33.97	32.37	23.34	28.69	40.34	50.05
CTRG_01195	444	973.9	1010.79	810.27	1106.81	814.7	781.59
CTRG_01196	1338	15.13	12.8	12.92	13.78	18.66	38.85
CTRG_01197	678	11.44	4.66	6.42	9.49	5.32	6.41
CTRG_01198	801	4.73	11.82	6.36	5.61	4.4	6.79
CTRG_01199	1152	48.42	125.89	92.1	60.22	72.96	60.29
CTRG_01200	3171	23.54	20.51	29.12	25.48	27.66	55.39
CTRG_01201	1656	25.31	40.69	46.29	41.9	41.51	66.56
CTRG_01202	1626	4.1	10.96	15	13.94	23.45	74.22
CTRG_01203	1410	13.83	19.58	35.37	13.63	15.13	32.81
CTRG_01204	1656	4.42	8.17	18.54	6.64	9.13	21.39
CTRG_01205	3327	0.06	0	0.06	0	2.66	2.13
CTRG_01206	1473	0.91	13	22.36	1.01	13.02	15.4
CTRG_01207	735	0	1.76	0.29	0.31	0.61	1.11
CTRG_01208	2307	8.51	7.77	8.44	12.64	14.66	15.16
CTRG_01209	966	23.97	31.24	17.6	29.19	47.11	63.09
CTRG_01210	2337	5.32	7.07	8.41	10.51	29.11	81.48
CTRG_01211	1959	1.23	4.19	3.1	4.6	4.82	20.37
CTRG_01212	1656	0.54	1	0.96	2.68	3	8.26
CTRG_01213	1218	153.47	171.94	122.78	189.44	174.7	218.89
CTRG_01214	1914	17.13	18.67	21.76	21.61	29.41	45.44
CTRG_01215	2334	16.82	14.65	10.25	10.35	43.03	76.62
CTRG_01216	1071	166.47	135.3	242.61	408.19	186.67	119.77
CTRG_01217	2106	23.09	27.21	28.68	29.39	24.28	28.01
CTRG_01218	2439	2.86	6.85	4.86	4.26	6.34	9.11
CTRG_01219	729	18.75	28.15	20.66	15.92	32.11	53.26
CTRG_01220	2910	27.13	26.61	46.4	33.51	45.5	63.6
CTRG_01222	1596	33.01	69.75	86.34	52.2	76.57	105.5
CTRG_01223	1500	14.88	17.05	20.6	17.31	24.57	18.12
CTRG_01224	735	0	0	0.58	0	0.3	0.28
CTRG_01225	453	0	0.32	0.79	1.64	0.54	0
CTRG_01226	1740	139.81	117.84	96.14	133.87	183.45	213.61
CTRG_01227	1944	8.71	12.93	17.37	17.81	26.4	49.09
CTRG_01228	1371	158.7	246.65	172.29	136.9	307.57	414.01
CTRG_01229	1719	46.86	54.25	53.46	38.32	40.14	51.46
CTRG_01230	2040	130.32	237.82	250.11	168.62	88.57	103.94
CTRG_01231	1566	68.21	67.84	59.67	64.24	89.66	126.88
CTRG_01232	2631	12.79	19.35	20.46	6.3	15.42	7.1
CTRG_01233	1407	33.93	49.5	78.3	42.52	57.07	76.96
CTRG_01234	438	0	2.67	0	0	0	0
CTRG_01235	1521	13.05	12.08	22	8.81	11.63	10.16
CTRG_01236	567	478.96	724.1	397.19	470.07	375.31	337.25
CTRG_01237	690	5.25	7.6	8.49	6.31	20.19	13.75
CTRG_01238	1152	0	0.21	0	0.19	0.18	2.51
CTRG_01239	5028	5.13	9.07	15.73	8.6	14.84	31.51
CTRG_01240	2943	53.19	91.2	160.4	98.26	122.28	167.17
CTRG_01241	1518	18.8	22.65	31.89	21.71	36.88	36.52
CTRG_01242	840	31.37	44.47	36.15	44.45	45.36	45.73
CTRG_01243	1227	28.42	33.48	30.86	30.42	53.01	52.21
CTRG_01244	2145	68.25	52.83	71.2	70.9	90.06	76.56
CTRG_01245	1170	0	1.04	0	0.19	30.98	13.34
CTRG_01246	2175	27.05	23.51	47.56	35.04	57.48	70.44
CTRG_01247	1986	12.28	12.4	15.3	13.51	88.72	99.82
CTRG_01248	1971	9.7	10.72	14.13	8.4	6.56	5.93
CTRG_01249	771	60.16	92.48	57.84	59.77	70.61	82.76
CTRG_01250	414	1365.41	1716.41	1174.29	1650.57	1138.25	1147.77
CTRG_01251	1539	82.37	97.48	118.46	106.57	92.54	126.2
CTRG_01252	360	57582.9	42095	23389.6	52597.4	38142.3	17130.3
CTRG_01253	477	835.08	978.11	923.67	990.29	796.11	781.17
CTRG_01254	1095	13.57	45.35	8.97	4.18	8.57	13.81
CTRG_01255	3813	19.25	31.57	77.38	36.31	63.36	103.04
CTRG_01256	1371	0.82	0.53	0.44	1.25	3.67	6.65
CTRG_01257	573	110.19	74.14	60.34	87	32.74	42.88
CTRG_01258	453	0	0.32	0.79	0	0	0
CTRG_01260	702	0.69	0	0	0.33	1.6	0
CTRG_01261	2271	80.74	88.32	102.59	76.27	103.62	128.98
CTRG_01262	2286	8.97	12.53	14.48	12.03	15.25	19.98
CTRG_01263	561	666.88	568.76	377	576.21	611.34	492.38
CTRG_01264	2115	6.94	12.27	23.29	12.75	29.79	37.76
CTRG_01265	297	32.56	20.71	17.56	19.93	22.42	9.77
CTRG_01266	396	57.84	125.23	62.25	74.49	54.06	45.83
CTRG_01267	663	4.4	1.99	1.32	1.39	0.34	0
CTRG_01268	342	122.93	357.48	143.23	159.1	219.53	139.47
CTRG_01269	489	93.91	71.82	41.37	62.79	147.13	116.51
CTRG_01270	708	0	0	0	0	0.32	0
CTRG_01271	552	0.91	1	0.41	2.15	2.54	4.29
CTRG_01272	4887	5.98	13.61	47.8	14.87	19.03	56.49
CTRG_01273	1950	7.44	7.71	6.64	4.2	4.32	6.28
CTRG_01274	2208	4.06	4.65	4.15	4.63	3.98	8.02
CTRG_01275	1920	12.15	19.34	31.81	17.39	11.45	24.48
CTRG_01276	1008	159.62	150.66	197.36	228.28	218.63	236.97
CTRG_01277	723	20.58	35.62	16.69	19.22	22.85	23.49
CTRG_01278	2358	11.65	19.63	21.28	14.83	9.67	22.31
CTRG_01279	2553	5.19	7.44	8.88	6.1	7	11.27
CTRG_01280	3069	2.32	2.55	3.83	4.64	13.87	14.83
CTRG_01281	1134	15.88	21.6	16.73	21.63	17.99	22.66
CTRG_01282	654	1.86	1.22	2.34	1.06	1.04	3.5
CTRG_01283	2751	20.87	23.43	27.33	31.3	36.22	38.79
CTRG_01284	2487	7.17	9.51	13.03	7.93	11.03	24.27
CTRG_01285	2223	16.02	31.79	32.98	28.53	35.72	45.96
CTRG_01286	429	44.74	74.11	71.26	64.99	414.88	355.77
CTRG_01287	2094	41.95	41.45	36.7	38.05	35.57	59
CTRG_01288	483	11834	9232.45	7482.56	10465	7827.44	4577.82
CTRG_01289	1878	15.13	21.06	21.15	17.79	7.23	9.21
CTRG_01290	789	19.24	42.91	15.09	4.85	3.64	8.7
CTRG_01291	2928	27.47	40.29	74.1	46.49	67.5	89.91
CTRG_01292	1005	29.83	36.56	31.63	32.75	43.18	63.09
CTRG_01293	186	61.69	136.52	35.26	71.87	67.51	39.98
CTRG_01294	3540	23.81	22.31	34.01	22.52	22.26	40.79
CTRG_01295	1233	17.44	24.83	8.21	15.92	18.15	19.75
CTRG_01296	1386	4.21	6.94	6.66	6.79	16.46	16.85
CTRG_01297	369	0	0	0.68	0	2.79	0.65
CTRG_01298	1902	34.95	56.76	75.94	46.38	42.58	63.04
CTRG_01299	2061	377	345.23	424.33	338.43	487.63	427.75
CTRG_01300	1365	70.59	64.73	71.04	71.36	92.41	120.32
CTRG_01301	417	257.69	201.63	116.39	197.78	132.8	100.08
CTRG_01302	624	146.88	178.7	103.7	135.47	105.71	54.18
CTRG_01303	2373	12.76	22.92	23.76	17.89	36.72	77.71
CTRG_01304	366	0	0	1.38	4.3	1.41	0.66
CTRG_01305	1017	39.4	40.22	90.41	71.98	185.7	170.84
CTRG_01306	1356	10.27	11.19	18.52	12.95	13.6	17.95
CTRG_01307	9849	9.17	12.54	36.12	13.82	22.81	67.33
CTRG_01308	711	27.75	37.8	38.58	21.2	31.47	20.2
CTRG_01309	2598	104.06	138.94	276.92	63.06	93.64	47.44
CTRG_01310	2190	9.38	14.49	19.07	10.96	20.33	43.06
CTRG_01311	1998	7.47	6.22	9.12	7.34	8.72	10.58
CTRG_01312	1962	1.79	4.55	1.5	0.43	1.67	3.78
CTRG_01313	2127	0	0.11	0.18	0.39	0.87	2.87
CTRG_01314	885	40.15	25.94	30.53	83.38	37.88	26.94
CTRG_01315	2493	2135.78	2312.27	3011.65	2283.32	2597.38	2551.22
CTRG_01316	669	241.44	548.9	288.91	266.18	193.69	237.38
CTRG_01317	1110	238.28	410.94	417.92	337.77	706.28	697.65
CTRG_01318	1509	3.99	8.86	4.89	4.09	6.35	3.13
CTRG_01319	1236	205.99	203.59	202.38	217.88	269.63	371.59
CTRG_01320	1521	17.88	25.9	12.57	21.53	27.09	36.82
CTRG_01321	888	85.27	59.34	40.79	60.05	80.87	52.34
CTRG_01322	1524	6.29	7.36	9.54	6.28	7.64	12.12
CTRG_01323	2085	3.78	8.64	12.01	8.03	8.93	16.59
CTRG_01324	2814	3.39	4.43	5.77	4.7	8.84	13.43
CTRG_01325	369	2.27	0.84	12.31	4.26	22.99	26.17
CTRG_01326	1317	8.04	14.49	21.55	13.53	26.8	47.34
CTRG_01327	759	190.33	209.79	207.93	119	165.66	94.7
CTRG_01328	1035	63.98	76.25	60.05	71.46	63.35	50.89
CTRG_01329	504	148.46	117.62	127.81	221.97	300.16	226.57
CTRG_01330	843	192.19	184.23	176.64	328.07	435.98	271.99
CTRG_01331	864	194.15	202.27	160.98	346.03	417.48	272.93
CTRG_01332	828	11.67	11.99	14.03	6.49	11.13	9.93
CTRG_01333	333	32.95	23.33	28.31	20.3	29.54	30.91
CTRG_01334	1086	91.25	91.09	82.78	81.66	94.48	89.71
CTRG_01335	864	194.15	202.27	160.98	346.03	417.48	272.93
CTRG_01336	843	192.19	184.23	176.64	328.07	435.98	271.99
CTRG_01337	909	96.66	162.04	120.36	89.97	102.92	118.3
CTRG_01338	894	16.19	17.19	16.15	12.17	20.19	25.31
CTRG_01339	1215	4.48	6.01	5	2.67	11.13	15.01
CTRG_01340	3906	8.4	18.41	32.56	17.85	27.11	62.13
CTRG_01341	1317	16.93	27.51	29.2	18.58	29.67	37.35
CTRG_01342	1500	14.58	14.02	10.77	19.15	33.04	19.5
CTRG_01343	1764	54.12	71.93	103.48	86.29	160.24	195.61
CTRG_01344	846	70.29	81.91	82.42	87.93	62.07	44.89
CTRG_01345	3015	20.64	31.61	44.03	23.82	23.17	35.76
CTRG_01346	1089	70.59	68.67	66.18	77.21	107.32	158.57
CTRG_01347	642	407.94	412.51	363.11	513.84	515.61	344.55
CTRG_01348	1410	0.16	0.85	1.56	0	0	1.61
CTRG_01349	2874	46	37.79	47	36.68	44.96	57.7
CTRG_01350	2103	48.74	58.61	60.24	52.69	68.88	71.83
CTRG_01351	951	8.05	14.98	11.79	4.87	8.86	14.7
CTRG_01352	1701	4.04	6.4	7.32	3.48	10.09	16.83
CTRG_01353	1644	0	0	0	0	0.13	0.8
CTRG_01354	384	265.9	273.11	151.7	233.78	172.68	191.61
CTRG_01355	435	22.59	26.95	24.8	32.8	14.12	38.42
CTRG_01356	1047	8.12	6.84	5.89	12.32	19.01	16.37
CTRG_01357	1041	379.22	390.44	279.36	358.42	493.08	388.38
CTRG_01358	3600	4.84	7.69	8.52	6.28	13	40.9
CTRG_01359	1635	0	0.58	0	0.39	0.25	0
CTRG_01360	1026	432.18	345.15	306.76	163.93	167.41	331.12
CTRG_01361	576	80.51	86.89	33.48	49.18	62.27	56.69
CTRG_01362	621	44.35	42.24	48.76	37.15	65.84	57.2
CTRG_01363	1179	15.99	13.66	12.24	21.29	27.67	33.8
CTRG_01364	2133	15.39	17.86	29.68	26.35	25.02	36.9
CTRG_01365	543	44.59	39.1	58.12	81.29	102.54	177.56
CTRG_01366	1308	590.33	566.99	380.23	504.45	350.13	351.76
CTRG_01367	1701	64.96	75.47	37.9	34.03	57.24	53.69
CTRG_01368	1362	83.46	113.16	99.95	71.21	64.63	115.16
CTRG_01369	1224	14.25	18.47	15.22	9.87	13.63	15.52
CTRG_01370	432	22.79	48.27	28.92	27.86	18.23	54.69
CTRG_01371	888	0.26	0.28	16.51	16.76	1.72	5.59
CTRG_01372	1161	33.9	93.24	138.3	81.37	75.46	75.39
CTRG_01373	1599	12.93	24.54	29.18	17.5	26.21	20.8
CTRG_01374	1653	0.13	0	0.36	0	1.25	0.57
CTRG_01375	504	100.67	66.34	68.26	76.39	63.61	73.78
CTRG_01376	471	106.1	202.96	132.07	129.37	159.15	132.61
CTRG_01377	873	21.19	63.98	46.15	37.48	55.44	51.53
CTRG_01378	783	7.88	10.82	13.59	12.67	12.69	14.97
CTRG_01379	705	10.25	8.9	8.59	8.43	13.66	8.16
CTRG_01380	747	220.68	354.69	214.64	240.2	287.38	267.04
CTRG_01381	576	900.29	1109.78	504.99	981.87	1342.99	668.41
CTRG_01382	1137	146.53	155.08	175.74	151.56	177.35	246.88
CTRG_01383	3933	6.16	8.82	15.17	8.91	15.04	26.5
CTRG_01384	804	3.24	5.73	5.28	9.5	22.45	15.27
CTRG_01385	1098	382.71	417.48	443.61	415.33	395.57	422.68
CTRG_01386	738	0.32	0	0.58	0.31	0.3	0.83
CTRG_01387	1614	71.43	96.9	99.45	77.31	84.53	95.87
CTRG_01388	615	9.61	7.41	13.68	14.8	24.92	23.97
CTRG_01389	1722	20.95	31.06	42.81	40.46	40.07	50.39
CTRG_01390	576	129.85	208.73	316.54	193.42	251.89	385.71
CTRG_01391	1860	36.96	46.47	53.84	40.81	57.19	48.53
CTRG_01392	2817	16.91	32.28	58.55	29.74	45.83	36.75
CTRG_01393	3144	6.38	7.68	10.59	7.87	21.3	26.84
CTRG_01394	3519	22	36.51	59.29	19.74	30.17	32.13
CTRG_01395	2184	66.48	58.14	63.8	71.78	70.14	55.52
CTRG_01396	768	0.31	1.34	0	0	0.29	0.79
CTRG_01397	1860	24.88	21.4	27.61	26.91	29.87	37.23
CTRG_01398	4032	6.49	14.99	34.26	14.58	20.82	45.9
CTRG_01399	963	107.26	152.35	175.09	119.66	169.16	227.28
CTRG_01400	1743	10.53	13.43	16.77	13.8	28.43	42.45
CTRG_01401	1299	0.52	0.37	1.71	0.33	0.49	2.35
CTRG_01402	5169	26.07	45.49	96.98	46.23	56.56	79.4
CTRG_01403	1377	6.36	18.52	22	13.98	14.3	17.38
CTRG_01404	1860	8.89	14.94	15.55	10.97	21.57	25.92
CTRG_01405	1038	1.33	3.57	13.68	6.74	2.27	1.32
CTRG_01406	2895	0	0	0	0.07	0.14	0
CTRG_01407	1281	12.68	9.07	20.16	15.78	5.75	7.61
CTRG_01409	1386	0	0	117.73	126.45	0	0
CTRG_01411	1434	46.51	51	73.09	50	78.5	129.94
CTRG_01412	720	44.7	42.67	42.81	50.34	50.56	58.01
CTRG_01413	1386	182.43	227.27	140.95	134.77	360.95	225.2
CTRG_01414	1416	58.06	62.04	86.67	83.55	65.1	68
CTRG_01415	1026	10.77	22.69	21.88	20.92	19.23	27.78
CTRG_01416	1569	20.85	18.37	23.18	21.64	20.12	30.46
CTRG_01417	1344	0	0.18	0	0	0.16	0.14
CTRG_01418	1065	11.41	20.61	14.06	12.09	19.26	23.56
CTRG_01419	594	13.35	15.47	7.88	14.23	22.08	40.7
CTRG_01420	5043	20.35	21.19	41.92	22.45	28.09	35.9
CTRG_01421	1191	11.05	19.24	21.99	17.79	23.64	28.58
CTRG_01422	1560	0	1.22	0.25	0.41	0.4	0.48
CTRG_01423	3435	15.1	12.21	20.78	18.86	14.7	15.94
CTRG_01424	3285	5.31	7.68	9.18	7.83	13.18	14.76
CTRG_01425	819	250.4	346.91	294.24	311.86	249.69	238.3
CTRG_01426	2373	23.05	25.18	32.77	29.72	48.47	84.99
CTRG_01427	1161	11.37	18.73	30.15	22.02	153.83	348.73
CTRG_01428	1029	154.93	176.1	159.49	123.83	165.42	228.19
CTRG_01429	8046	3.79	8.7	15.83	7.18	12.73	28.2
CTRG_01430	1818	3.16	6.62	10.19	1.51	3.17	7.89
CTRG_01431	1152	11.86	8.92	9.02	8.28	8.84	13.23
CTRG_01432	525	20.32	40.78	39.65	26.07	32.75	60.59
CTRG_01433	1728	20.87	16.02	27.21	17.1	21.52	15.47
CTRG_01434	2268	24.35	35.54	60.81	54.77	54.58	55.4
CTRG_01435	1086	32.66	33.31	102.77	102.72	321.76	357.24
CTRG_01436	453	127.63	143.14	102.07	105.61	372.63	514.48
CTRG_01437	189	0	0	1.9	1.89	1.88	0
CTRG_01438	1113	3.28	3.97	4.77	2.15	5.74	5.57
CTRG_01439	2382	27.81	30.64	42.36	31.7	42.21	73.77
CTRG_01440	2463	10.69	7.54	10.56	10.12	15.02	16.47
CTRG_01441	3087	8.39	12.89	18.27	10.49	13.33	17.98
CTRG_01442	1527	41.89	36.41	42.38	42.87	45.36	39.99
CTRG_01443	588	0	4.14	3.04	2.4	0	0.72
CTRG_01444	504	0	0	0.46	0	0	0
CTRG_01445	1113	74.68	95.26	82.24	75.21	83.2	70.45
CTRG_01446	1809	14.64	12.65	18.41	15.13	10.93	16.39
CTRG_01447	642	21.33	45.56	27.38	29.97	36.1	26.35
CTRG_01448	801	91	165.81	120.02	106.11	89.64	97.32
CTRG_01449	2142	10.01	23.34	20.79	12.87	18.8	18.28
CTRG_01450	1080	47.07	54.72	43.26	40.77	42.09	50.17
CTRG_01451	336	227.87	441.49	215.11	276.03	343.89	272.51
CTRG_01452	5274	0.85	2.06	2.56	2.67	2.99	5.61
CTRG_01453	5715	13.89	27.32	81.09	23.79	14.35	42.48
CTRG_01454	2643	13.05	19.52	26	17.57	22.56	32.89
CTRG_01455	2208	99.68	101.11	156.97	171.99	146.65	80.03
CTRG_01456	1512	0.59	1.11	1.71	0.56	3.44	4.87
CTRG_01457	1062	6.69	9.76	12.76	11.92	18.11	11.36
CTRG_01458	342	20.91	44.92	20.46	18.03	20.03	23.97
CTRG_01459	903	77.75	195.3	123.34	87.69	104.88	127.08
CTRG_01460	1515	7559.61	5270.2	7572.65	7047.24	4894.33	4658.93
CTRG_01461	438	9.68	14.02	19.12	8.56	26.31	19.82
CTRG_01462	3453	9.16	4.91	12.67	12.92	17.71	30.35
CTRG_01463	339	12707.9	9653.56	6108.4	11578.1	7813.49	4412.89
CTRG_01464	1158	11.79	8.23	12.3	10.85	7.15	8.83
CTRG_01465	429	22.99	28.13	7.29	7.61	4.6	9.11
CTRG_01466	1017	20.61	29.01	26.56	28.88	21.52	27.29
CTRG_01467	660	16.23	13.62	28.16	25.88	19.19	17.95
CTRG_01468	489	50.65	35.91	23.78	43.36	31.28	19.95
CTRG_01469	498	0	0	0	0	0	0.44
CTRG_01470	666	4.38	12.69	15.41	8.31	25.1	42.68
CTRG_01471	444	17.25	24.93	30.61	15.15	53.95	84.57
CTRG_01472	777	16.21	35.74	17.28	15.39	11.1	17.45
CTRG_01473	1014	60.89	78.75	96.81	83.89	95.06	65.55
CTRG_01474	1737	1.53	5.17	7.5	4.13	3.21	5.49
CTRG_01475	1902	15.39	19.54	29.24	16.79	21.18	22.58
CTRG_01476	552	125.69	270.2	227.47	107.73	153.79	172.47
CTRG_01477	411	106.32	173.61	175.53	126.66	122.52	115.59
CTRG_01478	423	204.38	212.25	142.81	176.17	158.12	134.66
CTRG_01479	459	37.61	48.62	22.67	28.74	34.15	27.12
CTRG_01480	567	4.85	5.3	1.98	1.67	5.73	2.64
CTRG_01481	2844	18.34	25.79	31.5	22.1	25.46	29.84
CTRG_01482	2658	13.3	9.14	16.82	9.2	12.81	19.34
CTRG_01484	1314	126.16	235.67	77.85	63.22	121.68	205.19
CTRG_01485	1125	66.51	108.74	101.05	106.97	119.1	99.19
CTRG_01486	3333	12.99	20.03	21.78	17.54	18.79	24.29
CTRG_01487	432	0.62	6.8	2.78	1.16	1.14	0
CTRG_01488	1236	8.24	6.29	10.15	5.58	12.12	10.86
CTRG_01489	1962	10.98	15.32	18	11.33	17.47	17.78
CTRG_01490	1716	137.1	121.8	134.65	144.94	147.14	153.14
CTRG_01491	1512	0	0.16	0.53	0.28	0	0.37
CTRG_01492	2139	14.43	19.66	85.2	12.99	20.55	88.79
CTRG_01493	2136	68.35	92.99	268.97	72.98	81.74	231.55
CTRG_01494	294	27.87	12.85	7.5	39.47	33.16	13.53
CTRG_01495	837	266.85	218.09	187.77	299.3	266.2	336.75
CTRG_01496	1596	0.7	1.04	0.75	0.4	0.91	2.35
CTRG_01497	1005	36.48	38.53	39.03	19.87	19.88	13.24
CTRG_01498	1047	7.9	18.41	13.15	7.1	8.79	7.26
CTRG_01499	1224	45.52	67.14	44.35	44.6	35.55	59.72
CTRG_01500	2280	78.88	71.82	78.25	51.28	52.58	73.27
CTRG_01501	3258	3.64	7.05	15.75	7.27	11.44	16.28
CTRG_01502	930	52.99	65.21	32.47	42.8	61.93	63.49
CTRG_01503	2157	0.1	0	0.27	0	1.23	1.03
CTRG_01504	2295	1.05	1.01	1.19	1	4.97	12.84
CTRG_01505	1266	41.22	70.07	58.07	49.98	92.53	243.72
CTRG_01506	1386	13.44	12.49	11.57	12.04	13.89	25.75
CTRG_01507	1827	35.13	70.59	63.06	19.81	20.97	17.03
CTRG_01508	5538	2.65	3.23	5.28	3.42	6.15	19.88
CTRG_01509	1431	20.18	26.98	19.57	20.58	17.66	19.98
CTRG_01510	1110	0.82	0.44	0.37	0.2	2.3	2.27
CTRG_01511	978	4.49	8.15	9.74	8.77	27.31	27.9
CTRG_01512	837	9.84	12.76	8.07	12.56	16.23	17.7
CTRG_01513	894	13.84	10.14	6.32	16.39	43.05	36.18
CTRG_01514	1248	1.45	2.14	2.92	4.14	12	14.58
CTRG_01515	861	7.9	6.76	9.03	9.58	12.17	17.83
CTRG_01516	837	16.59	16.71	19.91	18.97	17.54	22.24
CTRG_01517	186	380.75	543.56	309.53	417.6	279.68	260.81
CTRG_01518	282	1242.2	1476.84	865.49	1257.7	1021.31	987.31
CTRG_01519	2799	9.36	13.53	19.67	11.09	18.66	25.57
CTRG_01520	993	3.49	2.5	1.46	1.33	1.08	1.78
CTRG_01521	1293	126.8	214.77	174.96	127.64	124.29	148.85
CTRG_01522	1860	1.07	4.3	10.15	0.9	13.83	23.42
CTRG_01523	2304	25.47	27.18	22.64	15.91	26.71	37.15
CTRG_01524	1284	8.26	12.82	13.35	13.4	10	9.23
CTRG_01525	1560	7.42	9.16	8.8	8.3	8.66	14.36
CTRG_01526	1440	2.95	4.33	5	3.7	6.09	6.57
CTRG_01527	1698	9.78	16.46	19.1	15.55	26.18	45.19
CTRG_01528	1353	34.88	34.01	47.37	34.04	22.94	47.24
CTRG_01529	2088	34.84	36.3	62.57	33.96	45.97	54.13
CTRG_01530	1053	6.1	15.71	8	10.17	9.55	16.46
CTRG_01531	1101	8.93	11.61	8.92	9.49	17.42	20.6
CTRG_01532	1248	29.54	79.53	64.16	57.14	51.04	36.37
CTRG_01533	1599	19.32	21.57	23.84	24.13	16.22	25.97
CTRG_01534	1437	19.16	16.18	21.29	10.69	17	25.69
CTRG_01535	1284	55.71	73.71	84.06	63.63	68.68	103.71
CTRG_01536	1470	426.83	309.34	275.32	420.15	324.69	464.81
CTRG_01537	624	84.66	60.43	42.82	76.5	64.74	56.2
CTRG_01538	2619	19.73	23.86	29.58	17.65	24.63	53.2
CTRG_01539	1008	0	0	1.47	3.61	256.53	168.4
CTRG_01541	2286	2.96	5.09	5.71	6.2	111.77	158.3
CTRG_01542	1080	5.42	5.42	8	2.54	22.11	33.06
CTRG_01543	1065	5.81	18.06	12.91	2.66	36.32	93.67
CTRG_01544	4026	14.43	19.38	31.04	22.59	33.4	65.65
CTRG_01545	861	13.62	21.47	23.19	23.56	14.71	26.17
CTRG_01546	609	17576.3	13449.9	10048.6	14543.9	12378.6	7208.08
CTRG_01547	222	6.32	5.52	7.23	2.91	5.76	1.4
CTRG_01548	1884	21.97	17.11	56.87	38.26	44.75	72.17
CTRG_01549	2493	22.77	25.12	27.32	24.41	40.75	71.82
CTRG_01550	786	0.3	2.94	4.6	2.87	19.02	33.93
CTRG_01551	444	0	0	0	0	20.93	71.57
CTRG_01552	366	2.29	5.1	0.69	1.43	26.04	0.24
CTRG_01553	378	1.46	4.88	1.32	6.88	45.24	60.17
CTRG_01554	762	30.64	54.15	48.24	52.85	35.78	41.81
CTRG_01555	1008	0.23	1.23	4.67	2.48	147.7	89.14
CTRG_01556	1071	2.02	8.8	1.69	1.72	5.2	2.02
CTRG_01557	387	26.96	40.97	12.19	31.35	26.86	21.48
CTRG_01558	1032	21.62	19.42	18.75	16.33	31.98	16.45
CTRG_01559	1149	66.98	80.05	75.88	61.34	74.46	86.84
CTRG_01560	597	51.85	69.17	49.61	53.05	57	53.23
CTRG_01561	1368	10.34	19.18	16.87	8.29	12.56	12.09
CTRG_01562	702	1606.56	1527.29	1243.05	1754.2	2047.05	1899.39
CTRG_01563	417	5.8	7.84	5.24	7.28	18.46	4.45
CTRG_01564	3648	1	0.82	3.1	2.14	3.85	4.96
CTRG_01565	1431	56.16	72.24	96.04	86.65	74.73	63.13
CTRG_01566	1911	27.52	36.42	44.72	32.64	37.74	47.26
CTRG_01567	1785	42.56	37.7	45.96	43.2	53.6	91.57
CTRG_01568	369	166.92	155.6	108.01	137.6	109.39	129.56
CTRG_01569	864	46.94	93.74	55.93	68.87	91.96	65.29
CTRG_01570	990	12.36	18.34	17.75	11.54	14.56	15.05
CTRG_01571	1416	3.64	3.39	8.48	4.68	34.25	56.76
CTRG_01572	3156	11.69	19.95	35.23	22.6	21.6	23.28
CTRG_01573	1449	0	1.82	1.66	1.03	4.32	4.83
CTRG_01574	726	235.92	339.48	193.64	242.76	215.1	233.77
CTRG_01575	1179	225.08	224.75	206.32	245.58	190.47	171.62
CTRG_01576	1023	22.95	27.85	33.03	20.34	26	30.74
CTRG_01577	2001	13.39	11.72	22.72	11	18.34	29.55
CTRG_01578	1980	11.21	10.67	13.07	12.81	13.57	16.11
CTRG_01579	954	16.04	10.47	11.32	10.63	9.73	7.43
CTRG_01580	486	0	0	0.48	0	0	0
CTRG_01581	933	0.75	0	0	0	1.39	0
CTRG_01582	1233	125.02	103.84	81.92	101.09	123.27	130.62
CTRG_01583	681	42.33	47.1	32.26	42.51	34.38	20.33
CTRG_01584	1212	438.57	447.74	410.79	396.23	477.71	411.63
CTRG_01585	1758	10.69	10.62	11	14.15	7.04	16.15
CTRG_01586	1023	88.87	75.55	28.4	50.32	39.42	26.73
CTRG_01587	561	45.56	31.71	20.1	27.9	34.82	37.49
CTRG_01588	2217	14.69	27.35	32.55	17.13	18.51	19.38
CTRG_01589	2919	15.78	19.9	33.3	18.61	19.25	29.48
CTRG_01590	1239	185.54	220.89	150.4	157.11	147.5	152.05
CTRG_01591	1551	45.22	71.92	60.92	52.71	73.29	82.67
CTRG_01592	732	0.65	3.9	2.64	1.55	13.7	96.24
CTRG_01593	1164	62.92	91.3	90.89	95.1	97.47	124.86
CTRG_01594	1287	5.46	12.82	29.46	11.69	21.27	28.35
CTRG_01595	1050	0.66	2.35	2.35	1.04	2.24	4.82
CTRG_01596	801	515.59	670.57	346.01	387.93	489.16	509.98
CTRG_01597	3576	8.24	10.43	37.04	13.1	25.85	55.77
CTRG_01598	1947	43.58	51.51	75.7	62.39	65.06	82.48
CTRG_01599	900	9.85	19.3	18.58	9.61	16.9	14.32
CTRG_01600	690	12.26	11.78	13.53	15.62	14.66	14.64
CTRG_01601	675	30.54	23.8	18.39	18.41	30.39	25.76
CTRG_01602	981	95.43	127.9	154.65	114.79	154.77	189.23
CTRG_01603	1470	243.21	392.37	390.5	317.1	457.88	492.59
CTRG_01604	1224	13.51	21.05	14.23	17.28	38.66	39.81
CTRG_01605	1248	148.04	160.03	162.35	229.78	149.56	114.33
CTRG_01606	1056	664.27	690.47	575.26	688.16	494.15	489.01
CTRG_01607	288	1903.55	2692.15	1983.74	2320.87	2486.7	2264.13
CTRG_01608	558	6967.91	5805.32	5477.38	5543.04	5625.58	3950.2
CTRG_01609	2994	45.04	51.68	82.07	44.34	56.93	86.4
CTRG_01610	1332	14.53	12.86	14.35	20.93	30.89	32.32
CTRG_01611	2892	5.61	6.54	11.81	7.5	4.61	8.77
CTRG_01612	678	90.09	107.12	65.81	76.64	61.47	65.89
CTRG_01613	2181	22.36	32.43	38.92	29.67	38.21	57.46
CTRG_01614	465	349.25	499.77	330.21	325.89	502.2	269.09
CTRG_01615	2040	4.52	9.07	14.49	5.64	14.66	32.68
CTRG_01616	864	4.07	16.99	11.19	9.03	6.57	3.46
CTRG_01617	990	84.68	95.7	124.27	90.34	84.55	71.48
CTRG_01618	1320	14.67	20.3	22.26	19.67	21.32	19.21
CTRG_01619	684	1.42	9.22	5.08	8.39	5.92	12.08
CTRG_01620	660	2.58	2.4	1.66	0.7	8.23	14.48
CTRG_01621	1461	12.55	20.32	18.59	23.49	39.41	49.96
CTRG_01622	2505	11.37	12.22	29.12	17.08	25.55	48.69
CTRG_01623	3246	20.65	22.92	47.97	28.49	33.08	50.2
CTRG_01624	1056	108.21	191.67	121.35	113.97	120.7	108.75
CTRG_01625	1365	13.49	10.41	12.65	15.37	19.19	30.22
CTRG_01626	663	75.95	156.24	87	55.32	81.15	113.07
CTRG_01627	1305	13.81	30.37	37.67	23.2	26.74	27.63
CTRG_01628	1284	1.93	6.22	3.3	1	13.28	30.35
CTRG_01629	870	0	0	0	0	0.5	1.6
CTRG_01630	1314	71.82	72.98	92.56	74.98	92.9	155.13
CTRG_01631	1281	5.81	11.72	13.55	7.72	5.92	4.48
CTRG_01632	4659	10	15.27	24.65	15.7	18.61	33.37
CTRG_01633	1740	0.25	0.82	1.14	0	0.71	5.26
CTRG_01634	2583	15.22	15.6	26.03	21.84	28.13	33.62
CTRG_01635	1686	9.86	13.63	14.67	9.9	18.77	31.32
CTRG_01636	867	984.97	1207.07	1306.32	1253.68	1523.32	1468.68
CTRG_01637	429	106.87	107.73	86.97	106.56	140.78	143.06
CTRG_01638	1839	0.72	2.95	2.78	1.37	4.93	7.09
CTRG_01639	990	101.01	142.42	132.2	121.19	124.1	151.48
CTRG_01640	828	4.55	11.69	5.1	6.22	7.42	6.54
CTRG_01641	825	150.9	265.27	202.66	173.54	238.61	182.59
CTRG_01642	423	0	0.7	0	1.19	0	0
CTRG_01643	456	42	45.62	21.28	32.02	52.19	63.4
CTRG_01644	372	106.86	88.16	110.23	95.46	101.35	74.43
CTRG_01645	894	59.81	53.26	79.57	63.83	172.94	206.44
CTRG_01646	1392	22.24	21.59	28.51	21.5	25.26	40.77
CTRG_01647	2172	0.5	0	0.09	0	0.19	0
CTRG_01648	1635	0.41	1.6	1.33	1.04	0.89	2.07
CTRG_01649	987	5.85	17.14	15.51	8.91	15.48	6.36
CTRG_01650	2136	22.34	48.47	50.76	32.67	50.73	36.85
CTRG_01651	1311	325.28	469.2	396.49	341.75	344.3	339.1
CTRG_01652	1314	91.19	77.94	89.95	88.86	122.8	175.01
CTRG_01653	1119	23.66	28.72	43.61	49.14	78.91	68.47
CTRG_01654	3393	9.14	8.38	11.82	5.21	11.21	17.06
CTRG_01655	2205	0.59	0.32	0.27	0	1.94	2.26
CTRG_01656	393	18.08	22.37	7.55	13.73	8.99	6.01
CTRG_01657	1269	15.31	17.38	18.78	24.93	32.87	31.95
CTRG_01658	2028	43.06	72.1	119.17	73.01	71.94	75.82
CTRG_01659	879	40.73	39.35	38.64	53.4	60.47	76.7
CTRG_01660	201	0	19.73	97.45	10.24	387.41	885.58
CTRG_01661	912	152.51	119.56	127.01	88.92	77.32	28.87
CTRG_01662	546	138.89	286.99	178.18	116.12	108.29	198.52
CTRG_01663	501	143.91	299.37	224.28	144.21	140.49	222.1
CTRG_01664	975	9.49	16.1	11.68	10.61	15.03	11.88
CTRG_01665	2352	29.38	43.21	50.94	32.3	47.71	60.37
CTRG_01666	339	49.93	72.02	49.86	61.06	56.9	35.3
CTRG_01667	2187	32.29	34.15	44.79	20.9	26.9	17.97
CTRG_01668	1224	27.2	64.35	77.44	58.7	63.68	48.12
CTRG_01669	1020	38.83	54.42	45.87	39.96	66.68	93.09
CTRG_01670	1485	11.13	17.71	21.09	18.5	18.52	27.47
CTRG_01671	2220	20.08	23.11	80.11	45.95	102.98	163.4
CTRG_01672	1071	14.55	30.14	24.32	17.72	24.93	23.05
CTRG_01673	3168	33.77	112.21	143.12	44.76	134.48	276.23
CTRG_01674	1284	46.92	73.33	88.46	70.16	76.05	75.89
CTRG_01675	1416	44.77	36.28	33.23	36.35	35.13	50.06
CTRG_01676	1350	24.98	31.78	24.56	24.6	26.72	31.85
CTRG_01677	735	0.65	0.35	0.58	0.93	1.21	0.83
CTRG_01678	1005	28.45	19.27	25.26	30.78	41.05	10.51
CTRG_01679	1437	123.81	152	88.93	123.38	131.08	135.44
CTRG_01680	339	40.62	76.76	50.63	45.99	69.37	37.5
CTRG_01681	723	757.29	584.74	451.1	435.18	475.16	461.3
CTRG_01682	999	87.3	120.85	63.06	53.18	113.19	154.27
CTRG_01683	1713	22.61	26.4	33.7	35.13	21.83	28.61
CTRG_01684	1113	44.93	75.86	84.62	67.01	58.52	46.09
CTRG_01685	1272	34.08	43.42	39.68	50.4	48.02	44.95
CTRG_01686	3498	10.08	9.3	15.96	8.87	11.21	14.04
CTRG_01687	1839	44.48	64.84	48.49	33.41	42.09	67.76
CTRG_01688	1161	49.38	42.52	48.9	53	73.63	95.32
CTRG_01689	960	21.48	20.02	17.29	16.76	26.3	23.77
CTRG_01690	1878	23.1	16.42	17.9	27.42	28.91	40.12
CTRG_01691	366	12.98	153.12	102.98	5.73	74.65	342.73
CTRG_01692	369	0.76	0	0	0	0	1.31
CTRG_01693	819	0	0.31	0.52	0	0	1.47
CTRG_01694	2109	17.76	25.83	36.15	23.89	31.04	43.3
CTRG_01695	1845	78.14	69.86	74.68	68.52	70.29	68.53
CTRG_01696	342	650.62	772.04	478.21	646.58	519.93	546.24
CTRG_01697	1248	1.63	0.97	1.62	1.55	6.42	4.14
CTRG_01698	1164	592.26	379.27	257.46	342.24	432.52	317.61
CTRG_01699	5088	10.02	11.32	21	10.86	18.78	28.34
CTRG_01700	645	291.7	329.49	279.09	274.03	367.47	385.04
CTRG_01701	330	163.32	169.42	100.32	158.65	223.85	143.57
CTRG_01702	696	0	0	0.31	0	0.97	0.89
CTRG_01703	528	0	0	0	0	0	0.41
CTRG_01704	1356	13.59	18.12	23.4	17.85	26.44	29.88
CTRG_01705	3900	14.91	17.97	40.8	14.04	17.33	14.69
CTRG_01706	1491	30.54	40.25	46.15	34.55	42.62	47.62
CTRG_01707	867	96.23	163.69	125.71	105.87	149.74	85.03
CTRG_01708	1596	11.7	9.69	12.81	10.09	17.68	15.42
CTRG_01709	306	0	0	2.66	0	0	1.7
CTRG_01710	837	0.28	0.3	1.26	0.8	3.66	8.37
CTRG_01711	2109	7.68	8.98	14.64	11.3	31.04	55.23
CTRG_01712	2028	21.75	38.59	97.15	61.65	21.32	26.12
CTRG_01713	4038	21.76	33.16	49.26	32.93	39.9	72.3
CTRG_01714	564	192.18	273.31	27.55	40.33	400.74	518.46
CTRG_01715	1374	1.31	5.6	5.4	4.52	32.62	43.56
CTRG_01716	1260	164.09	198.97	144.48	169.68	250.9	339.29
CTRG_01717	7443	13.93	11.14	25.56	13.68	22.31	60.27
CTRG_01718	1680	19.79	33.86	39.46	31.2	27.21	21.29
CTRG_01719	2676	36.72	38.11	46.93	24.31	28.71	22.63
CTRG_01720	1530	11.65	24.48	30.84	19.45	25.15	26.48
CTRG_01721	1074	21.76	10.55	14.51	26.81	18.89	8.68
CTRG_01722	1941	287.05	514	562.18	404.44	737.77	506.16
CTRG_01723	2256	17.91	15.39	28.85	16.36	17.99	14.29
CTRG_01724	1266	24.27	40.01	62.38	44.71	56.91	135.38
CTRG_01725	1395	9.32	15.51	22.41	18.08	45.3	38.91
CTRG_01726	1647	169.72	172.94	182.64	162.28	237.65	271.55
CTRG_01727	372	62.02	76.52	79.8	149.5	74.46	37.54
CTRG_01728	963	189.27	130.59	154.85	199.97	133.09	64.73
CTRG_01729	1677	0.26	1.7	1.06	0.63	2.96	4.36
CTRG_01730	948	12.73	21.62	15.78	16.06	15.27	20.37
CTRG_01731	441	58.8	76.77	48.2	62.23	59.96	68.25
CTRG_01732	1029	0	0.24	0.6	0	0	0.38
CTRG_01733	1518	0	0	0	0.28	0.82	1.49
CTRG_01734	2859	1.97	2.9	5.4	2.89	8.56	12
CTRG_01735	783	13.64	19.68	11.96	8.35	26.8	39.75
CTRG_01736	1278	62.17	62.91	72.17	62.6	63.75	104.99
CTRG_01737	339	126.11	102.34	41.42	125.29	95.87	59.56
CTRG_01738	516	147.22	284.67	169.99	134.51	174.96	155.59
CTRG_01739	774	5.22	4.32	4.96	3.5	7.43	15.43
CTRG_01740	2310	0.94	3.93	5.22	3.79	4.59	11.08
CTRG_01741	1680	92.07	107.65	126.76	112.86	209.21	199.43
CTRG_01742	1689	3.41	2.95	3.16	6.26	5.27	3.88
CTRG_01743	747	203.41	335.29	147.49	195.86	197.24	287.48
CTRG_01744	1767	40.77	41.98	53.04	39.61	56.74	68.25
CTRG_01745	5004	6.05	6.44	14.06	5.5	7.34	16.16
CTRG_01746	801	152.17	140.25	142.54	113.4	108.06	43.76
CTRG_01747	2559	10.36	21.19	29.84	13.87	23.08	24.71
CTRG_01748	1410	48.15	50.41	51.84	28.63	44.34	41.96
CTRG_01749	1599	22.38	45.37	39.73	23.07	32.3	50.53
CTRG_01750	540	245.49	261.81	154.91	180.03	214.25	258.14
CTRG_01751	1008	90.56	135.15	106.66	97.28	98.45	198.93
CTRG_01752	774	21.81	27.59	26.17	32.67	21.72	27.73
CTRG_01753	801	9.45	11.5	13.78	12.63	11.55	16.09
CTRG_01754	783	66.09	133.48	95.43	80.63	83.78	76.66
CTRG_01755	1197	8.72	12.42	13.56	18.06	16.09	24.25
CTRG_01756	1104	93.14	120.6	115.2	93.22	91.84	119.16
CTRG_01757	684	140.13	139.04	90.56	144.35	157.57	121.98
CTRG_01758	1557	0	0	0.77	0.41	2.4	1.57
CTRG_01759	1551	0	0.31	0.13	0	0	0.12
CTRG_01760	1710	1.55	1.8	5.9	2.1	91.01	281.16
CTRG_01761	1068	95.94	121.42	164.22	142	109.82	162.92
CTRG_01762	894	381.87	575.11	543.85	929.85	438.79	334.97
CTRG_01763	711	115.41	217.25	136.4	149.67	120.53	102.15
CTRG_01764	1815	66.01	49.77	56.12	59.5	73.44	106.39
CTRG_01765	1764	16.66	15.4	19.35	15.66	16.14	23.6
CTRG_01766	1497	0.15	0.16	0.53	0.14	0.28	2.02
CTRG_01767	747	1.28	2.08	0.29	0.3	3.27	1.91
CTRG_01768	1239	89.3	72.91	55.52	68.55	76.3	99.46
CTRG_01769	807	165.54	331.63	209.11	122.2	169.87	307.68
CTRG_01770	642	46.09	41.42	39.7	50.91	47.42	54.33
CTRG_01771	519	7.36	6.98	3.98	4.17	9.55	5.89
CTRG_01772	1296	3.31	1.87	2.49	5.14	7.3	7.07
CTRG_01773	1191	2.86	2.05	1.7	0.91	5.15	4.84
CTRG_01774	1386	52.93	23.07	73.64	128.53	463.5	364.11
CTRG_01775	1311	96.23	116.29	61.29	61.08	181.61	228.11
CTRG_01776	852	0	1.19	0.25	0	1.03	1.64
CTRG_01777	1032	12.03	30.93	26.73	26.94	219.09	329.74
CTRG_01778	846	11.39	28.5	32.87	19.01	533.83	810.45
CTRG_01779	1917	0	0.12	0	0	0	0.19
CTRG_01780	1917	0.23	0.37	0.1	0.11	1.71	5.33
CTRG_01781	1659	5.21	7.15	11.58	9.56	7.86	9.15
CTRG_01782	2775	5.23	5.91	10.03	3.95	9.34	19.81
CTRG_01783	1023	953.55	1330.62	1045.71	1136.4	1055.9	602.16
CTRG_01784	468	127	229.14	170.31	153.52	147.51	89.13
CTRG_01785	2448	53.61	59.27	87.17	53.48	76.33	123.3
CTRG_01786	564	67.91	63.48	48.32	68.06	66.72	65.38
CTRG_01787	687	18.31	17.96	21.81	26.39	24.87	21.03
CTRG_01788	1038	3.76	3.34	2.38	5.9	3.3	4.32
CTRG_01789	537	26.83	16.99	7.63	14.25	26.2	25.83
CTRG_01790	900	69.22	107.95	132.86	170.1	91.75	50.23
CTRG_01791	450	19.89	29.65	25.34	29.79	30.86	23.17
CTRG_01792	645	3276.12	3406.97	2530.91	3064.29	3276.92	2857.08
CTRG_01793	1986	1.99	5.08	8.29	4.64	29.33	42.58
CTRG_01794	531	32.45	59	37.81	26.63	23.45	27.42
CTRG_01795	834	54.21	51.54	70.35	44	53.87	26.66
CTRG_01796	1938	31.2	27.52	52.07	45.59	30.3	41.11
CTRG_01797	678	30.39	48.52	34.67	33.23	33.56	24.41
CTRG_01798	1608	9.67	11.53	9.63	10.41	10.06	13.2
CTRG_01799	3294	129.38	151.18	216.74	165.82	199.38	271.56
CTRG_01800	849	4.43	16.14	6.45	5.26	7.21	7.06
CTRG_01801	1026	34.76	49.72	56.61	44.61	52.04	47.96
CTRG_01802	1098	25.82	28.65	25.9	22.01	28.73	45.73
CTRG_01803	1830	164.02	281.6	371.25	195.95	276.04	289.54
CTRG_01804	6612	16.45	20.93	54.24	27.46	36.02	96.54
CTRG_01805	1047	66.02	65.13	90.11	92.49	90.15	112.02
CTRG_01806	1800	5.52	4.98	5.69	3.74	6.87	5.39
CTRG_01807	978	20.1	24.45	42.76	29.24	31.06	35.53
CTRG_01808	1017	48.01	64.11	58.18	35.13	60.99	141.44
CTRG_01809	1101	2.28	6.7	1.3	1.38	16.45	13.03
CTRG_01810	1557	17.16	19.74	15.07	10.09	10.54	8.46
CTRG_01811	990	98.67	110.27	101.71	77.02	93.46	120.39
CTRG_01812	981	15.79	45.68	21.31	37.44	181.55	196.63
CTRG_01813	2766	7.28	19.45	49.75	20.65	12.74	22.85
CTRG_01814	735	0	0	0.29	0	0	0.83
CTRG_01815	1098	74.75	120.65	120.55	132.83	91.23	52.08
CTRG_01816	1143	189.34	219.7	130.51	192.84	143.45	170.28
CTRG_01817	858	85.05	133.76	47.79	53.03	45.07	72.78
CTRG_01818	291	0	0	0	0	0	0.92
CTRG_01819	849	35.97	65.45	53.08	37.88	53.58	59.3
CTRG_01820	1014	12.72	19.81	22.58	13.84	20.32	18.12
CTRG_01821	606	892.99	1869.94	659.93	674.56	272.12	1079.4
CTRG_01822	555	133.47	226.39	126.23	115.18	145.25	147.3
CTRG_01823	465	4.49	3.09	4.56	1.59	4.68	4.35
CTRG_01824	897	12.23	12.07	5.6	6.43	12.36	14.37
CTRG_01825	558	0.45	4.42	3.64	0	2.92	19.25
CTRG_01826	459	0	0	0	0	4.23	0
CTRG_01827	399	0	3.02	1.23	0.64	57.32	94.87
CTRG_01828	423	1.27	9.09	2.29	4.17	13.45	16.37
CTRG_01829	447	0	13.65	6.39	2.78	1.64	9.15
CTRG_01830	420	1.28	0	0.58	4.21	5.9	6.06
CTRG_01831	462	3.4	2.49	1.02	1.6	19.39	38.48
CTRG_01832	426	0	0.69	0	0	0.58	2.7
CTRG_01833	1377	25943.8	26655.6	25323	24057.7	25409.4	20488.6
CTRG_01834	2160	16.61	14.49	20.97	11.41	13.53	14.19
CTRG_01835	1191	1.91	3.89	0.68	0.18	3.91	4.68
CTRG_01837	1176	11.21	5.4	8.99	5.89	8.65	6.71
CTRG_01839	4830	4.73	8.56	18.24	6.17	6.78	15.71
CTRG_01840	420	3.19	14.82	4.61	9.02	20.07	6.06
CTRG_01841	1455	2.61	3.13	2.88	2.78	5.02	5.2
CTRG_01842	1212	63.21	104.61	100.19	80.17	80.75	58.15
CTRG_01843	1959	48.13	26.25	39.86	36.94	26.4	18.85
CTRG_01844	2433	83.75	101.36	134.11	102.78	132.49	232.41
CTRG_01845	651	0.37	3.67	1.68	0.71	2.44	0.96
CTRG_01846	1926	5.03	8.79	11.93	7.96	11.2	11.19
CTRG_01847	984	16.44	14.67	9.25	15.19	15.75	13.36
CTRG_01848	1014	0.23	1.96	0	0	0	1.35
CTRG_01849	1038	1.99	3.34	1.59	0.84	1.65	2.82
CTRG_01850	2295	3.99	15.32	18.92	8.44	15.45	17.73
CTRG_01851	582	3.85	5.13	9.23	1.62	6.35	12.07
CTRG_01852	2808	0.69	0.33	0.21	0.44	1.37	2.47
CTRG_01853	3516	11.99	11.98	23.23	12.28	14.58	23.86
CTRG_01854	1377	87.7	106.4	110.15	107.21	103.11	86.22
CTRG_01855	3198	0.38	0.21	39.47	8.65	2.65	3.63
CTRG_01856	1896	79.8	212.05	450.35	93.6	156.77	486.5
CTRG_01857	1020	64.78	57.09	47.28	52.2	49.64	75.08
CTRG_01858	1341	231.77	206.96	177.35	209.06	189.46	215.49
CTRG_01859	1308	5.34	9.42	6.62	9.69	50.94	110.54
CTRG_01860	1392	45.28	45.93	40.18	48.38	28.26	40.63
CTRG_01861	603	26.65	101.83	60.08	20.97	55.58	113.25
CTRG_01862	1644	0	0.14	0.12	0	0.13	0.91
CTRG_01863	456	239.92	259.76	126.66	210.6	238.06	130.26
CTRG_01864	1815	0.85	1.3	0.87	1.39	4.31	2.57
CTRG_01865	2079	0.63	1.46	3.86	1.21	4.14	7.03
CTRG_01866	1275	16.64	28.3	39.9	37.45	25.93	17.54
CTRG_01867	1170	10317.8	8469.42	8037.83	9546.85	8098.95	5325.42
CTRG_01868	1995	4.84	3.76	9.24	4.62	3.91	7.99
CTRG_01869	828	73.15	93.8	45.16	47.87	52.72	43.1
CTRG_01870	858	432.91	486.89	260.53	391.49	323.1	309.97
CTRG_01871	783	33.65	46.24	49.76	66.23	57.55	48.78
CTRG_01872	1731	7.03	6.29	6.62	9.27	8.47	10.58
CTRG_01873	2652	3.11	6.28	7.3	1.88	5.73	8.76
CTRG_01874	1263	24.69	63.15	66.7	25.74	43.04	43.63
CTRG_01875	465	0	0	0.51	0	0	0
CTRG_01877	1794	92.67	144.59	201.65	149.71	121.57	96.8
CTRG_01878	549	16.96	26.55	18.15	13.88	36.57	32.6
CTRG_01879	1194	35.93	37.55	28.05	35.85	44.31	39.3
CTRG_01880	243	245.37	176.87	115.08	185.18	217.79	129.24
CTRG_01881	1467	0.76	1.31	2.72	1.74	50.18	66.11
CTRG_01882	783	93.98	110.85	74.5	85.52	61.49	56.78
CTRG_01883	651	104.18	135.24	107.74	65.38	79.4	99.53
CTRG_01884	960	11.1	32.5	33.28	6.66	134.89	226.44
CTRG_01885	1413	57.72	73.57	45.77	39.75	496.37	677.67
CTRG_01886	1038	0	0.24	0	0	0.21	0.38
CTRG_01887	591	0	0.92	0.38	0	23.39	38.79
CTRG_01888	1035	2	0.48	1.19	0.21	4.76	4.9
CTRG_01889	1017	39.63	74.1	42.57	33.84	53.6	72.45
CTRG_01890	939	419.45	653.34	670.28	467.9	465.57	687.1
CTRG_01891	2280	9.76	9.3	16.23	7.86	8.67	14.94
CTRG_01892	618	2.39	4.77	4.65	5.28	4.81	11.23
CTRG_01893	1167	5.46	9.42	14.47	9.65	4.36	6.44
CTRG_01894	1074	19.84	33.03	19.28	19.9	17.7	33.29
CTRG_01895	1542	8.23	10.67	8	13.64	16.18	23.09
CTRG_01896	360	28.1	34.82	19.08	47.61	45.34	29.78
CTRG_01897	765	96.81	66.37	58.92	99.62	108.88	109.49
CTRG_01898	501	15466.8	11941.2	7708.13	12993.3	10624.5	5304.98
CTRG_01899	855	344.84	292.89	239.66	342.65	331.26	348.32
CTRG_01900	3714	5.9	9.6	25.62	14.76	18.54	18.22
CTRG_01901	1464	0	0.16	0	0	0	0
CTRG_01902	4257	13.73	18.03	32.18	11.73	14.95	16.14
CTRG_01903	576	3.03	0.47	0	0	5.62	4.08
CTRG_01904	687	40.14	61.14	18.65	33.74	42.88	28.54
CTRG_01905	684	79.97	78.74	75.94	102.72	201.97	154.29
CTRG_01906	2013	6.54	8.85	11.19	9.37	12.02	16.85
CTRG_01907	1026	16.82	41.27	55.01	17.5	50.16	109.04
CTRG_01908	2487	17.05	30.22	33.55	24.64	33.99	57.25
CTRG_01909	1533	0.15	0.31	1.56	1.25	0.68	0.12
CTRG_01910	1713	23.52	24.32	55.97	18.61	50.55	76.87
CTRG_01911	1653	60.65	87.57	95.16	70.78	82.55	107.97
CTRG_01912	867	3.78	20.13	3.39	0.77	4.03	1.38
CTRG_01913	900	8.81	12.86	9.52	10.11	9.66	10.8
CTRG_01914	1182	8.07	4.54	2.58	8.97	15.05	11.56
CTRG_01915	399	12.96	9.83	4.93	9.62	7.56	8.84
CTRG_01916	810	8.81	11.76	64.27	7.86	326.89	1068.21
CTRG_01917	735	0.59	4.14	13.25	2.36	51.86	153.97
CTRG_01918	1266	37.47	68.92	66.21	48.45	83.21	112.57
CTRG_01919	1728	201.14	282.87	341.3	231.22	244.32	225.47
CTRG_01920	2427	7.09	12.54	10.16	6.25	17.35	50.32
CTRG_01921	1734	8.04	9.6	22.83	12.29	28.93	38.97
CTRG_01922	2250	0.22	0.41	1.07	0.24	5.05	8.93
CTRG_01923	4881	2.03	3.29	9.52	2.86	10.78	12.84
CTRG_01924	2481	0.92	0.56	1	0.69	0.34	1.53
CTRG_01925	3267	61.35	62.81	124.18	47.34	73.01	182.42
CTRG_01926	5070	3.19	4.02	10.73	4.64	7.94	16.79
CTRG_01927	636	9.63	3.77	8.3	3.65	20.39	31.58
CTRG_01928	951	5.36	16.82	24.02	9.97	9.31	15.74
CTRG_01929	603	5.74	16.08	8.85	10.87	11.8	12.62
CTRG_01930	3684	4.31	5.9	12.53	3.9	6.49	7.17
CTRG_01931	765	242.79	228.09	318.87	331.67	205.9	247.87
CTRG_01932	7314	21.95	26.59	64.88	30.93	38.9	86.56
CTRG_01933	1110	8.85	14.6	22.09	18.81	22.83	29.48
CTRG_01934	1380	17.73	22.83	27.62	23.87	19.88	33.99
CTRG_01935	741	18.08	32.52	49.53	33.4	102.98	132.3
CTRG_01936	600	0.41	0	0	0	0.77	0.71
CTRG_01937	867	2446.21	2626.26	2218.29	2134.52	2345.26	2106.38
CTRG_01938	1632	59.98	67.23	71.19	76.8	151.47	191.78
CTRG_01939	1908	29.53	27.61	33.88	29.61	40.17	55.23
CTRG_01940	1260	256.99	288.07	310.29	321.75	400.1	538.86
CTRG_01941	3039	94.81	136.91	240.22	149.31	199.01	284.28
CTRG_01942	651	1.87	0.41	4.04	3.2	4.53	4.16
CTRG_01943	1497	3.58	4.79	5.73	2.7	4.59	6.94
CTRG_01944	2112	21.46	21.37	26.65	16.33	25.47	37.29
CTRG_01945	1074	60.15	51.16	44.1	49.35	78.54	109.27
CTRG_01946	654	23.11	17.82	14.06	22.97	23.9	36.6
CTRG_01947	471	53.05	51.65	44.35	59.99	77.27	54.19
CTRG_01948	1422	8.35	9.96	13.37	10.06	36.15	66.36
CTRG_01949	3048	5.6	6.95	10.62	6.77	10	13.08
CTRG_01950	675	86.6	133.44	93.58	104.3	98.53	123.58
CTRG_01951	2472	28.25	34.73	54.88	33.28	93.82	150.93
CTRG_01952	1149	122.67	57.06	193.41	331.22	1036.54	1165.34
CTRG_01953	1095	0.84	0.22	0	0.4	0.39	3.72
CTRG_01954	1524	8.34	13.31	14.38	9.9	16.52	16.33
CTRG_01955	1722	18.76	26.66	33.17	23.05	32.15	44.3
CTRG_01956	297	34.6	29.92	31.43	41.77	54.18	23.99
CTRG_01957	837	112.76	112.99	86.7	125.06	149.72	193.49
CTRG_01958	750	30.88	32.41	21.71	21.46	29.61	29.84
CTRG_01959	564	61.25	59.12	65.89	59.65	92.67	120.11
CTRG_01960	1332	15.2	13.77	15.1	15.62	50.9	59.77
CTRG_01961	840	14.28	8.77	11.55	8.25	21.12	27.15
CTRG_01962	1068	0	2.08	0.58	1.63	1.6	3.09
CTRG_01964	1482	0	0.16	0	0	0.14	0.64
CTRG_01966	975	0	1.02	0	0	0.44	0.6
CTRG_01967	2205	0.3	2.65	0.71	0.47	0.56	1.09
CTRG_01968	423	12.65	9.79	3.43	9.53	7.6	7.64
CTRG_01969	1638	8.26	10.44	15.97	4.65	15.05	39.28
CTRG_01970	2388	49.81	50.32	74.07	32.58	48.07	32.33
CTRG_01971	537	0.47	0.51	1.27	0.45	3.06	5.65
CTRG_01972	609	341.59	339.37	141.34	223.82	155.03	174.28
CTRG_01973	1530	17.04	21.68	27.72	19.72	74.91	114.93
CTRG_01974	879	77.46	69.23	51.28	107.8	185.88	196.39
CTRG_01975	870	12.66	21.22	10.62	6.91	10.78	4.81
CTRG_01976	576	34.19	33.06	43.22	24.59	43.79	23.34
CTRG_01977	900	32.93	78.3	45.52	48.57	47.8	28.86
CTRG_01978	1356	60.32	85.99	156.13	74.87	220	432
CTRG_01979	711	283.61	274.86	160.7	224.18	202.03	203.15
CTRG_01980	477	3.26	10.76	19.62	6.68	14.11	12.16
CTRG_01981	192	167.1	204.98	46.29	101.27	129.71	102.49
CTRG_01982	657	158.7	233.69	180.19	159.98	167.11	134.87
CTRG_01983	1287	8.06	24.63	25.86	22.88	26.81	24.04
CTRG_01985	1068	1.72	16.39	8.26	3.88	32.21	43.51
CTRG_01986	948	222.94	391.09	293.9	212.3	217.02	176.44
CTRG_01987	759	1.26	0.34	0.85	1.49	4.38	7.76
CTRG_01988	888	0.53	2.84	2.36	3.5	7.84	7.38
CTRG_01989	882	0	0.29	0	0	0.49	2.03
CTRG_01990	1368	0.33	0.18	1.76	1.88	38.44	33.2
CTRG_01991	1929	0.91	3.78	5.19	3.26	11.61	19.35
CTRG_01992	2889	17.75	21.39	34.4	29.47	33.8	56
CTRG_01993	1431	12.36	11.9	12.72	18.19	24.23	18.93
CTRG_01994	1089	14.92	30.72	16.54	13.6	21.74	18.89
CTRG_01995	2151	29.91	31.49	35.32	27.97	31.83	56.07
CTRG_01996	492	24.09	37.93	24.54	22.26	11.16	16.2
CTRG_01997	1323	300.84	287.58	242.32	203.68	201.43	196.62
CTRG_01998	414	241.22	295.66	160.37	168.98	200.13	228.99
CTRG_01999	684	67.94	101.02	100.41	91.98	86.84	61.9
CTRG_02000	867	32.17	40.85	23.74	29.81	40.01	50.79
CTRG_02001	453	45.83	29.39	18.84	21.89	32.22	29.97
CTRG_02002	1947	3.05	3.86	3.63	3.34	7.59	11.25
CTRG_02003	987	9.36	11.85	5.24	7.35	7.41	4.97
CTRG_02004	1392	42.54	49.21	53.14	47.15	48.56	69.54
CTRG_02005	1506	172.58	252.37	262.06	167.81	200.46	220.5
CTRG_02006	1056	22.16	25.48	17.89	21.93	182.47	240.72
CTRG_02007	879	102.74	113.18	90.63	101.98	171.01	275.13
CTRG_02008	1722	22.74	29.13	23.76	23.78	57.35	46.15
CTRG_02009	3120	6.43	6.41	7.03	5.09	8.4	17.55
CTRG_02010	1353	6.81	14.6	7.57	5.07	5.89	9.42
CTRG_02011	1176	113.04	182.63	259.61	318.59	350.99	478.79
CTRG_02012	2349	23.2	21.68	24.76	21	19.85	28.97
CTRG_02013	1392	51.4	58.71	47.23	52.53	71.86	158.85
CTRG_02014	2118	21.71	46.58	69.39	42.73	46.06	47.21
CTRG_02015	1293	0	0.19	0	0.17	0	0
CTRG_02016	1965	17.45	17.08	23.86	23.69	12.53	18.98
CTRG_02017	1725	0.13	0.41	0.34	0.12	0.24	1.08
CTRG_02018	495	395.96	306.18	289.95	295.75	383.96	302.07
CTRG_02019	582	433.6	367.04	354.55	376.77	404.3	316.67
CTRG_02020	2544	15.2	13.57	22.02	9.63	16.28	16.79
CTRG_02021	1818	22.09	17.64	18.1	12.27	20.4	22.66
CTRG_02022	1086	150.26	179	164.44	171.54	184.84	223.56
CTRG_02023	2727	38.47	45.08	62.75	52.08	62.25	77.76
CTRG_02024	1029	747.8	596.39	362.2	494.9	424.79	316.58
CTRG_02025	768	163.31	150.93	145.38	124.49	151.36	155.44
CTRG_02026	1902	63.53	85.07	97.53	70.24	91.85	124.22
CTRG_02027	501	20.49	19.66	6	10.16	15.66	6.16
CTRG_02028	2931	4.94	5.27	13.29	2.82	11.03	14.99
[truncated: 4,157 more rows]
